# Supplementary material for: Heterobimetallic 3d–4f complexes supported by a Schiff-base tripodal ligand
Source: Royal Society of Chemistry journal article supplement (doi:10.1039/d3dt03760f), 2024-01-01
Supplement: d3dt03760f1.pdf [file d3dt03760f1.pdf]

Supplementary Information

**Heterobimetallic 3d-4f complexes supported by a Schiff-base tripodal ligand**

Till Neumann,<sup>‡,a</sup> Benedict C. Thompson,<sup>‡,a</sup> Denny Hebron,<sup>a</sup> Daniel M. Graycon,<sup>a</sup>  
Alberto Collauto,<sup>b</sup> Maxie M. Roessler,<sup>b</sup> Daniel W. N. Wilson<sup>a</sup> and Rebecca A.  
Musgrave<sup>\*,a</sup>

<sup>a</sup>King's College London, Department of Chemistry, Britannia House, 7 Trinity St,  
London SE1 1DB

<sup>b</sup>Molecular Sciences Research Hub, Department of Chemistry, Imperial College  
London, 82 Wood Lane, London W12 0BZ

[rebecca.musgrave@kcl.ac.uk](mailto:rebecca.musgrave@kcl.ac.uk)

**Contents**

|    |                                                                                                        |    |
|----|--------------------------------------------------------------------------------------------------------|----|
| 1. | <sup>1</sup> H NMR spectroscopic characterisation data for compounds <b>1–5</b> .....                  | 2  |
| 2. | EPR spectra for compounds <b>2</b> (NaOTf), <b>4</b> and <b>5</b> .....                                | 6  |
| 3. | UV/Visible absorption spectra for <b>LH<sub>3</sub></b> and compounds <b>1–5</b> .....                 | 8  |
| 4. | ATR infrared spectra for compounds <b>1–5</b> and <b>LH<sub>3</sub></b> .....                          | 11 |
| 5. | Electrochemistry for <b>LH<sub>3</sub></b> and compounds <b>2</b> (NaOTf), <b>4</b> and <b>5</b> ..... | 12 |
| 6. | Evan's magnetometry for compounds <b>1</b> (NaOTf), <b>2</b> (NaOTf), <b>4</b> and <b>5</b> .....      | 15 |
| 7. | Crystallographic data for compounds <b>1–5</b> .....                                                   | 16 |
| 8. | Computational Details .....                                                                            | 18 |

# 1. $^1\text{H}$ NMR spectroscopic characterisation data for compounds 1–5

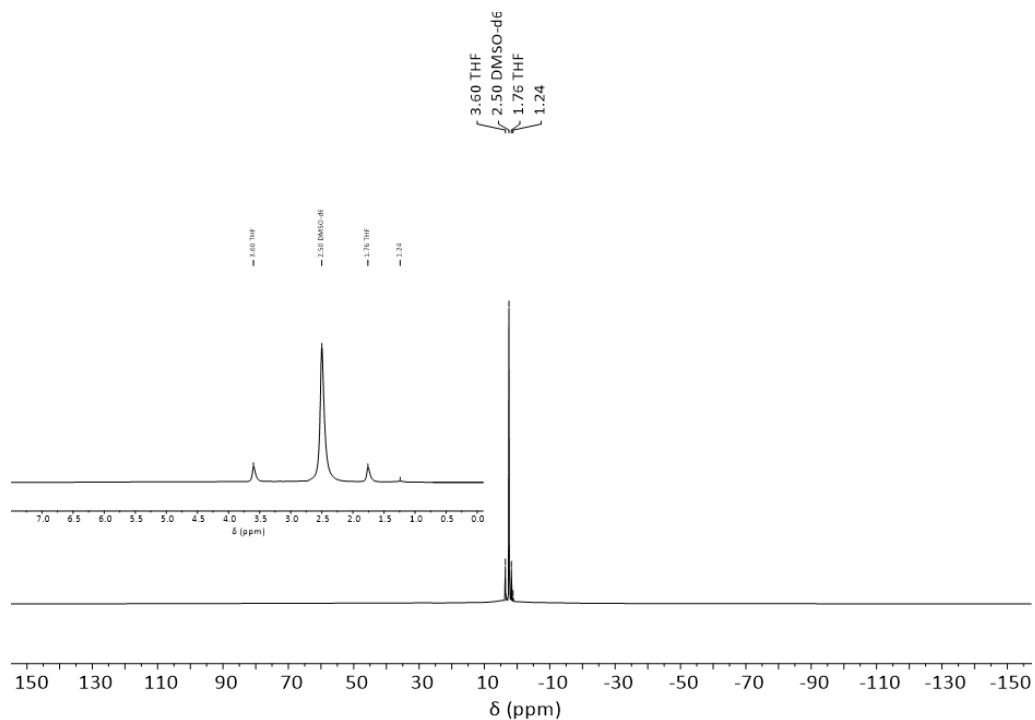

**Figure S1:**  $^1\text{H}$  NMR spectrum (400 MHz,  $d_6$ -DMSO) for compound 1(NaOTf).

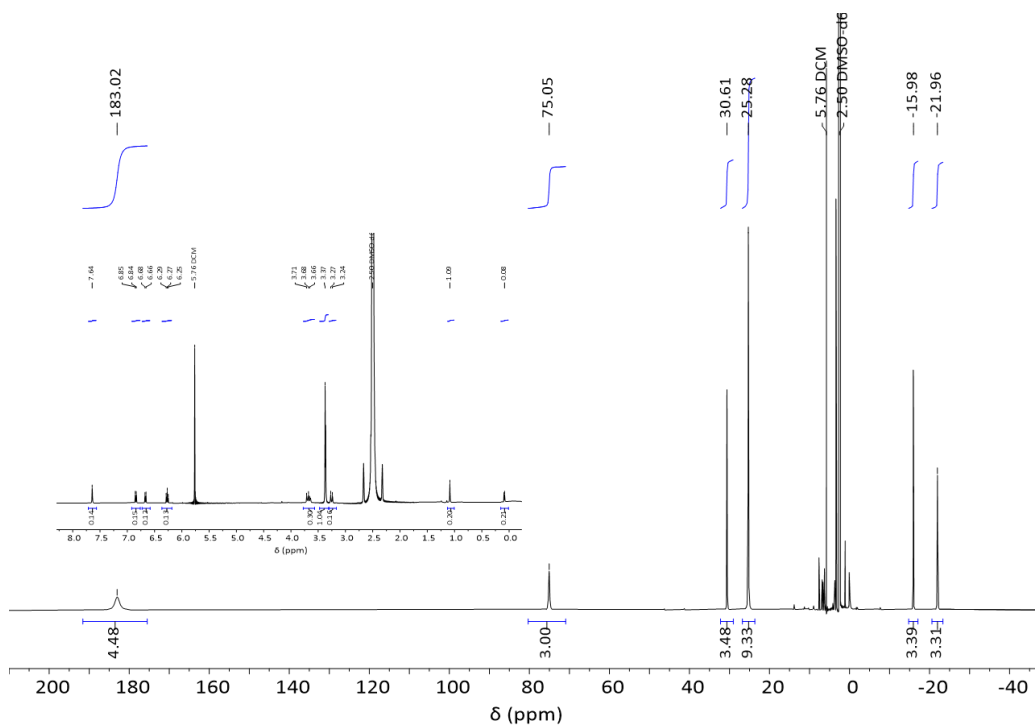

**Figure S2:**  $^1\text{H}$  NMR spectrum (400 MHz,  $d_6$ -DMSO) for compound 2(NaOTf). Additional peaks in diamagnetic region (e.g. 6.25 – 7.64 ppm) correspond to ligand-based impurities at 5% contamination.

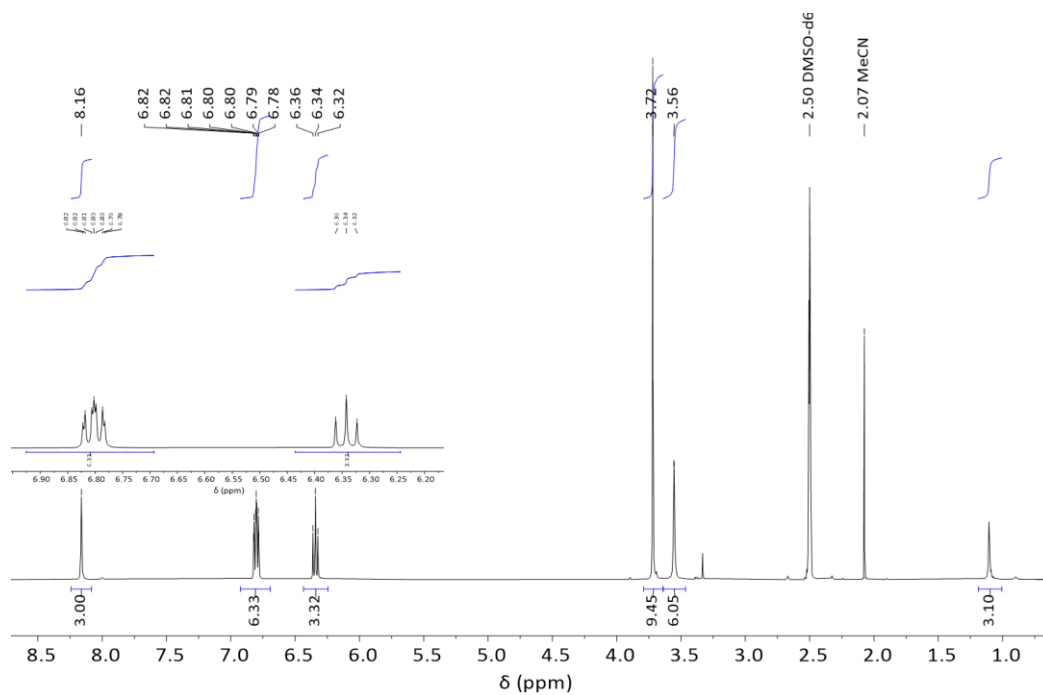

**Figure S3:**  $^1\text{H}$  NMR spectrum (400 MHz,  $d_6$ -DMSO) for compound **3**(NaOTf).

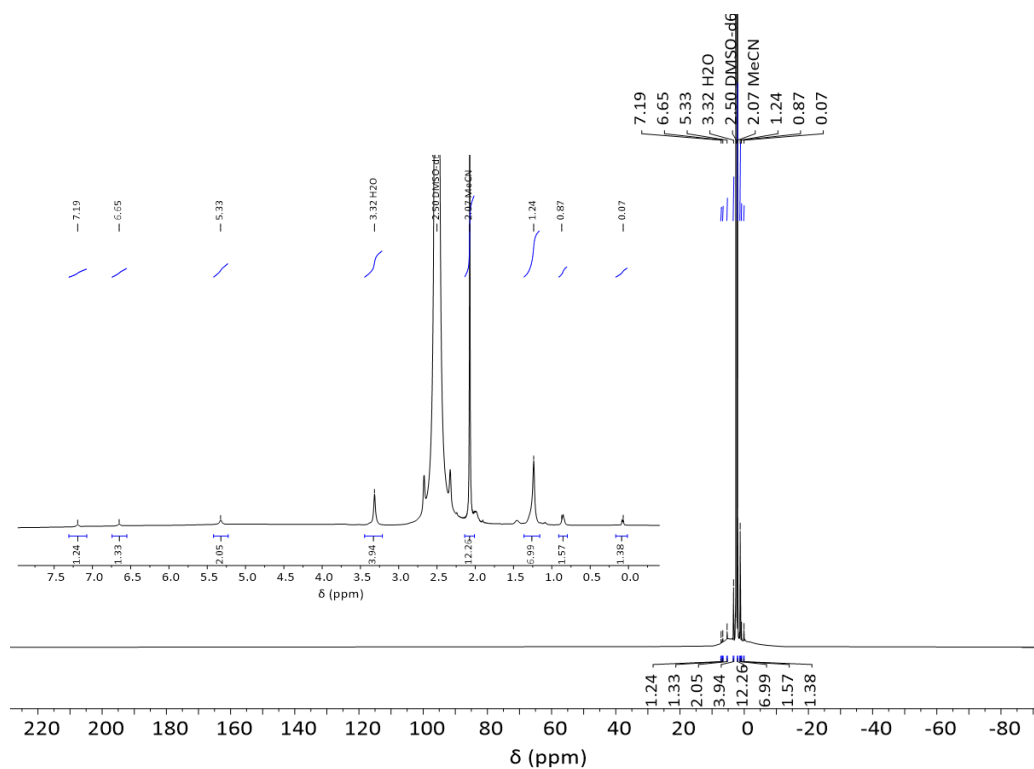

**Figure S4:**  $^1\text{H}$  NMR spectrum (400 MHz,  $d_6$ -DMSO) for compound **4**.

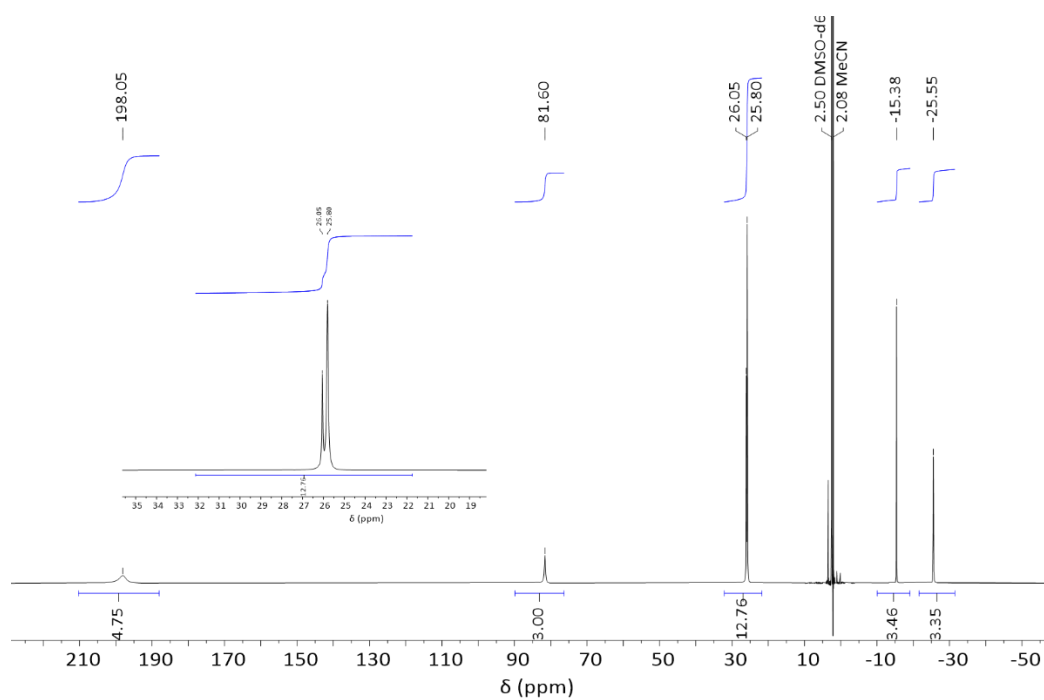

**Figure S5:**  $^1\text{H}$  NMR spectrum (400 MHz,  $d_6$ -DMSO) for compound **5**.

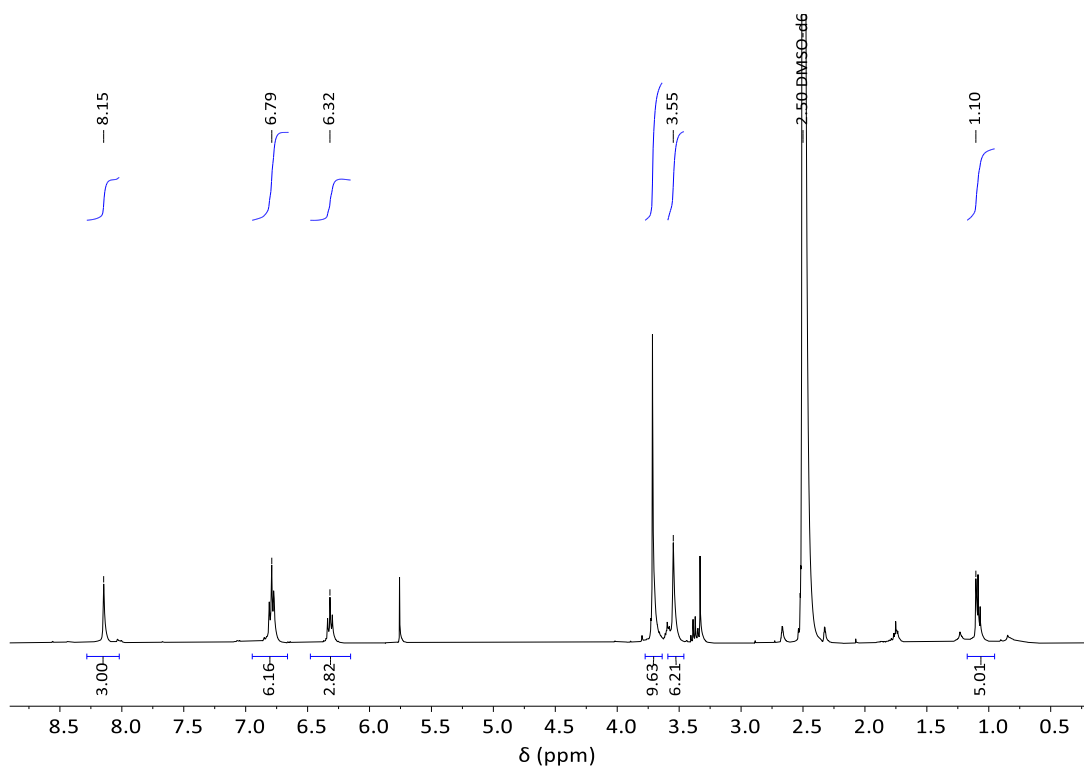

**Figure S6:**  $^1\text{H}$  NMR spectrum (400 MHz,  $d_6$ -DMSO) for the reaction of compound **3**(NaOTf) with  $\text{Co}[\text{OTf}]_2$  in THF at room temperature for 6 h.

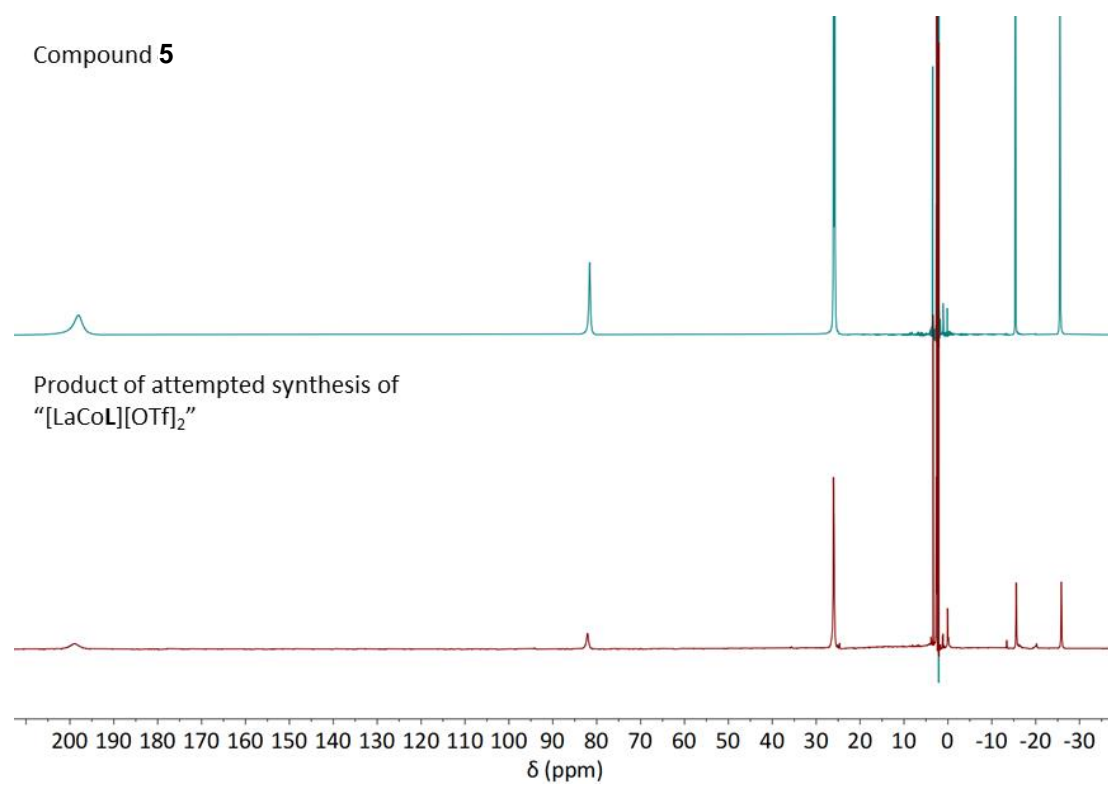

**Figure S7:** Comparison of <sup>1</sup>H NMR spectra (400 MHz, *d*<sub>6</sub>-DMSO) between compound **5** and the attempted synthesis of [LaCoL][OTf]<sub>2</sub>.

2. EPR spectra for compounds **2**(NaOTf), **4** and **5**

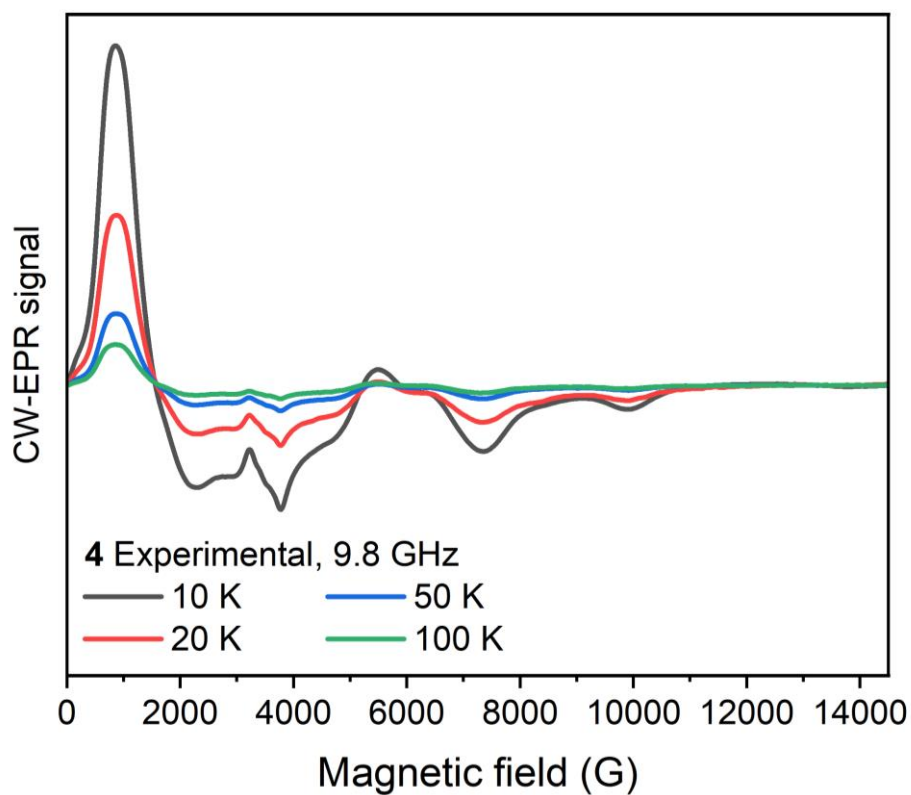

**Figure S8:** EPR spectra of **4** (5 mM, MeCN) at 10, 20, 50 and 100 K.

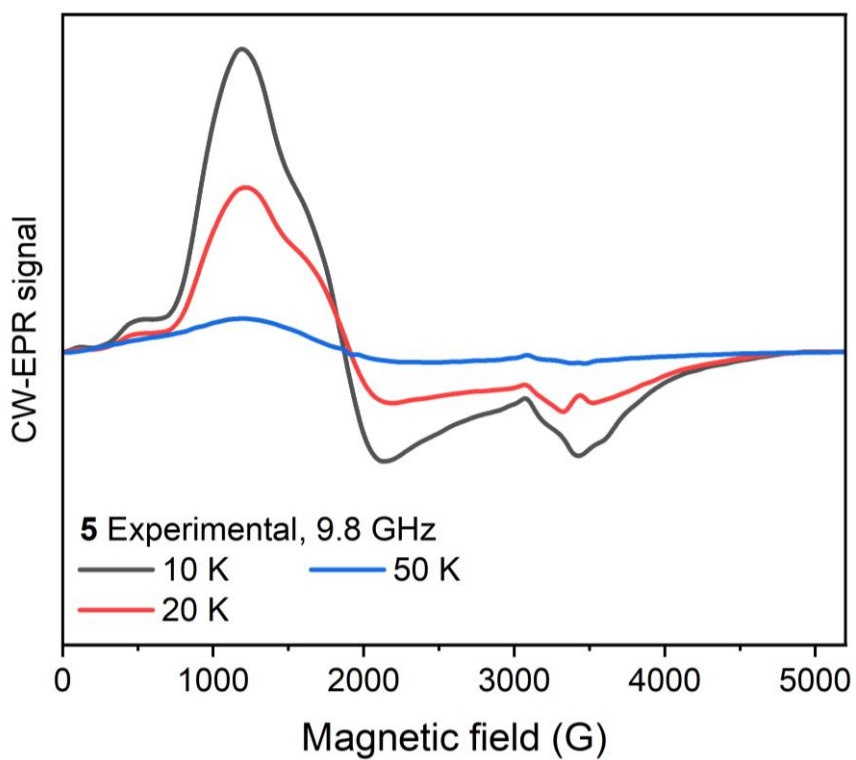

**Figure S9:** EPR spectra of **5** (5 mM, MeCN) at 10, 20, 50 and 100 K.

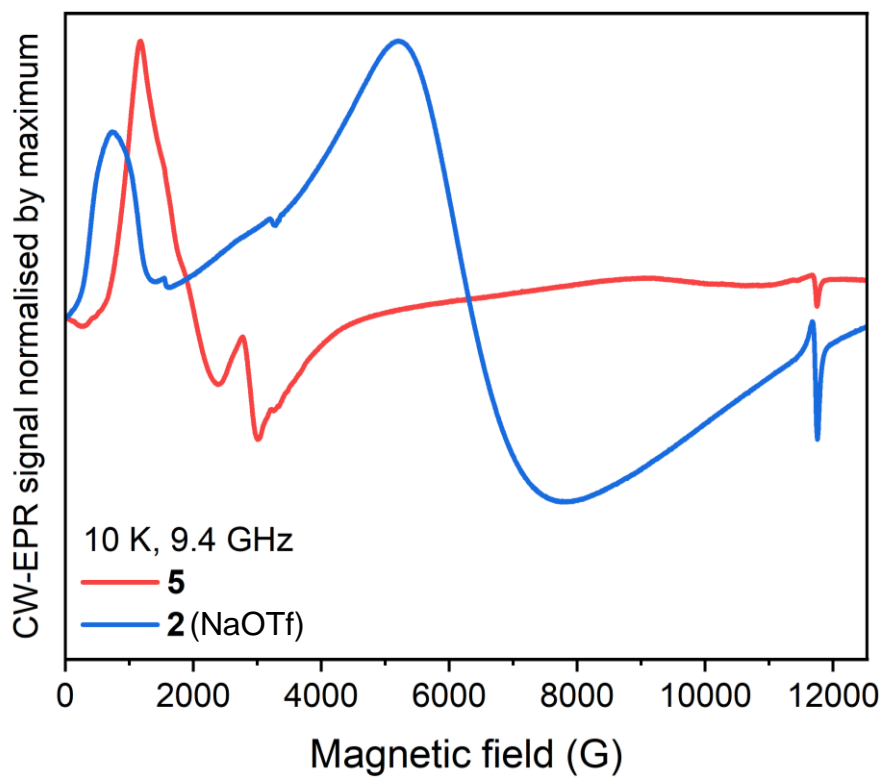

**Figure S10:** EPR spectra of **2**(NaOTf) and **5** (5 mM, MeCN) at 10 K.

### 3. UV/Visible absorption spectra for LH<sub>3</sub> and compounds 1–5

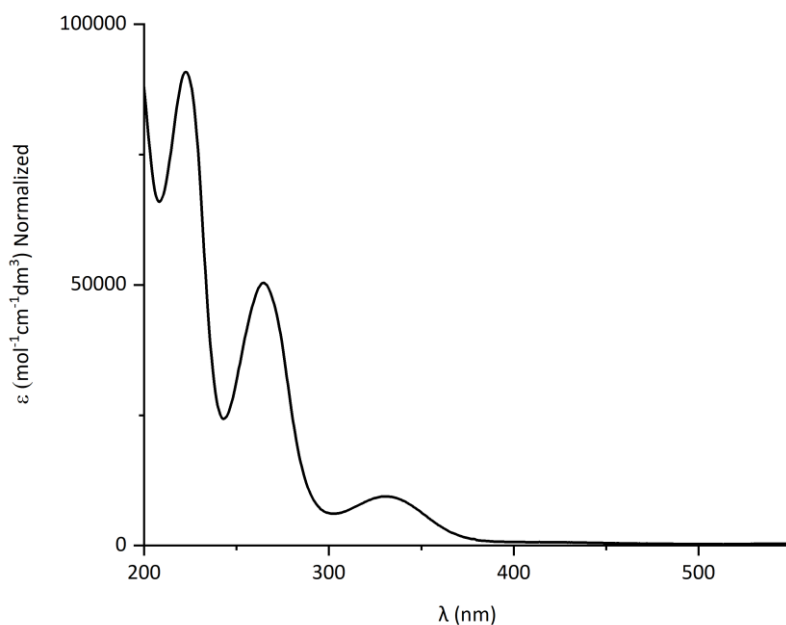

**Figure S11:** UV/Visible spectrum for compound LH<sub>3</sub> in MeCN (20 °C,  $1.6 \times 10^{-5}$  M).

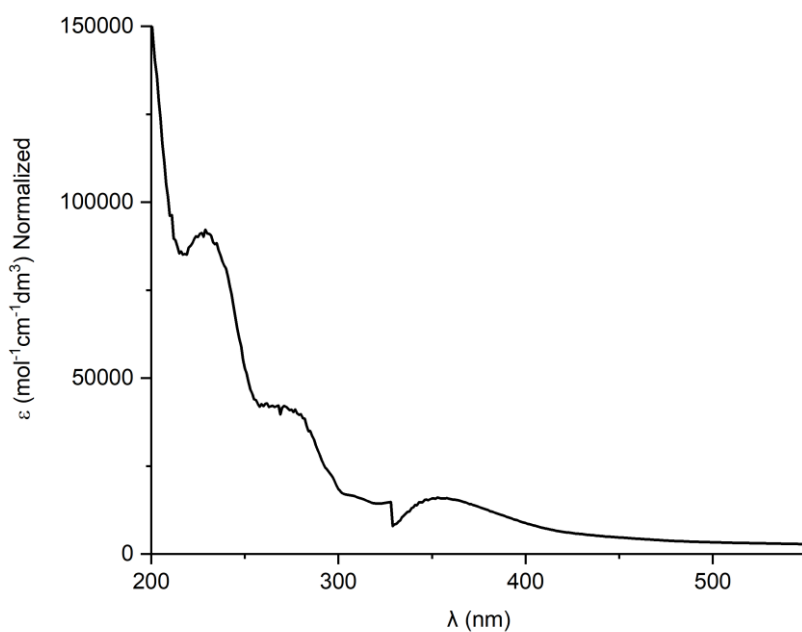

**Figure S12:** UV/Visible spectrum for compound 1(NaOTf) in MeCN (20 °C,  $1.4 \times 10^{-5}$  M). Feature at 473 nm is an artefact of the spectrometer corresponding to UV lamp switching.



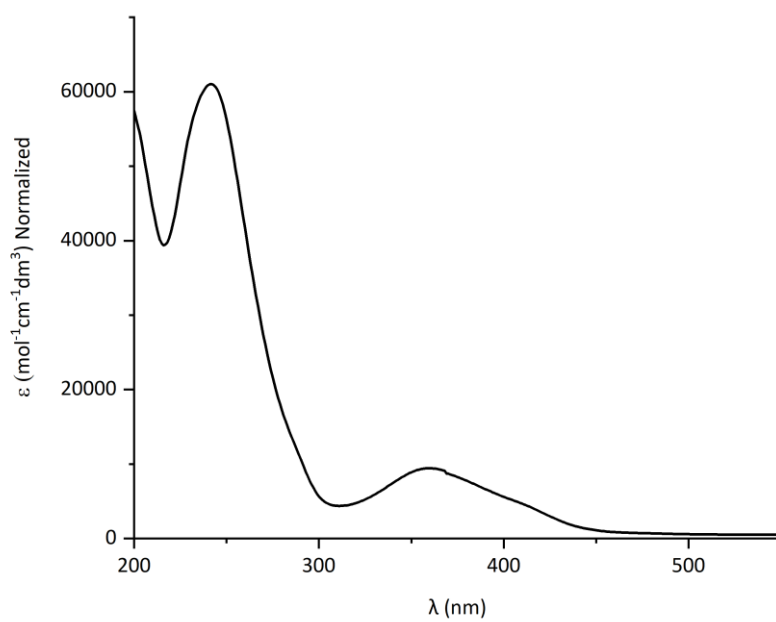

**Figure S13:** UV/Visible spectrum for compound **2**(NaOTf) in MeCN (20 °C,  $4.2 \times 10^{-5}$  M).

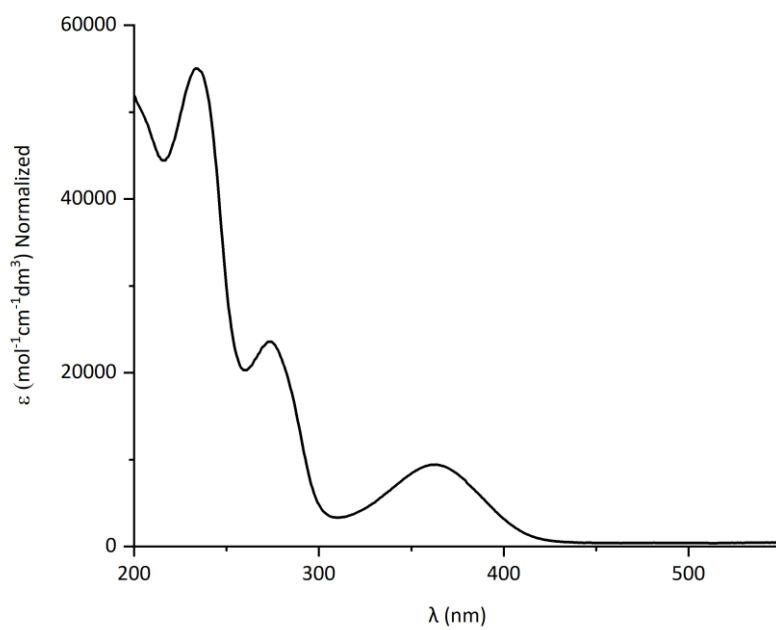

**Figure S14:** UV/Visible spectrum for compound **3**(NaOTf) in MeCN (20 °C,  $3.0 \times 10^{-5}$  M).

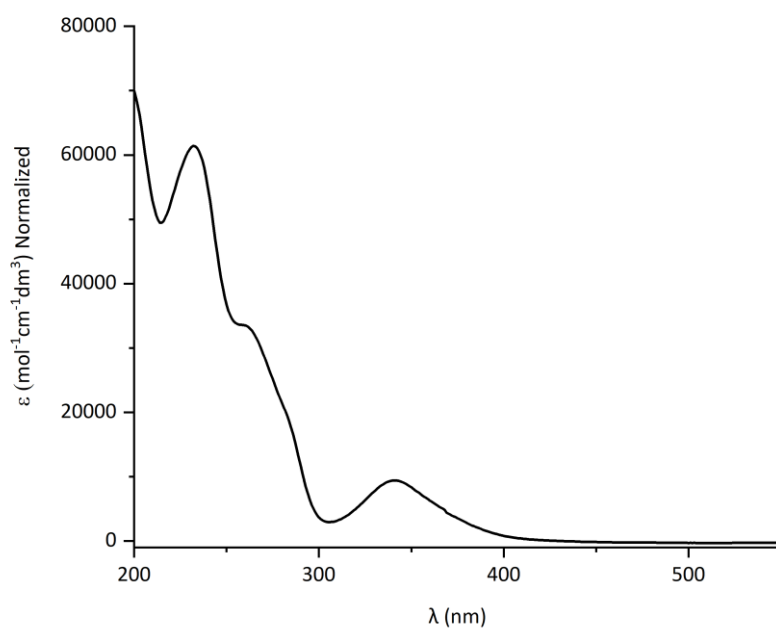

**Figure S15:** UV/Visible spectrum for compound 4 in MeCN (20 °C,  $6.4 \times 10^{-5}$  M).

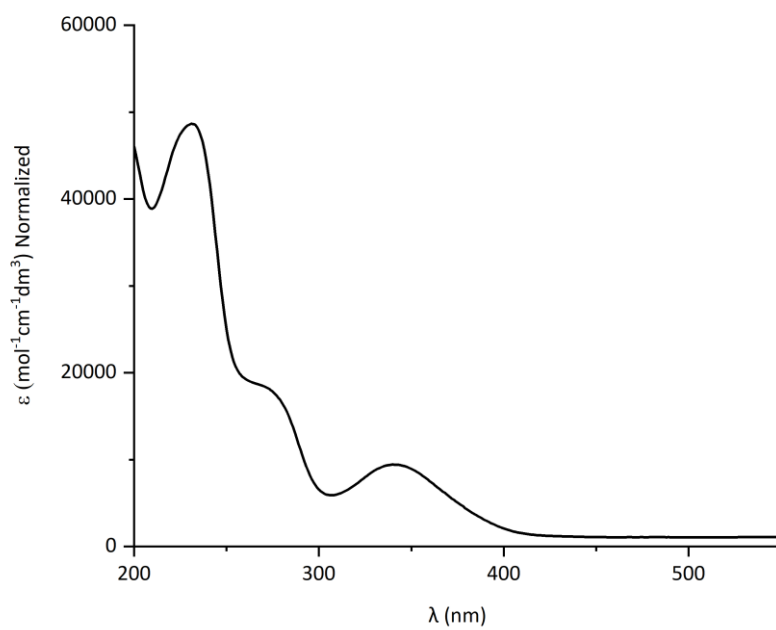

**Figure S16:** UV/Visible spectrum for compound 5 in MeCN (20 °C,  $1.0 \times 10^{-5}$  M).

4. ATR infrared spectra for compounds 1–5 and LH<sub>3</sub>

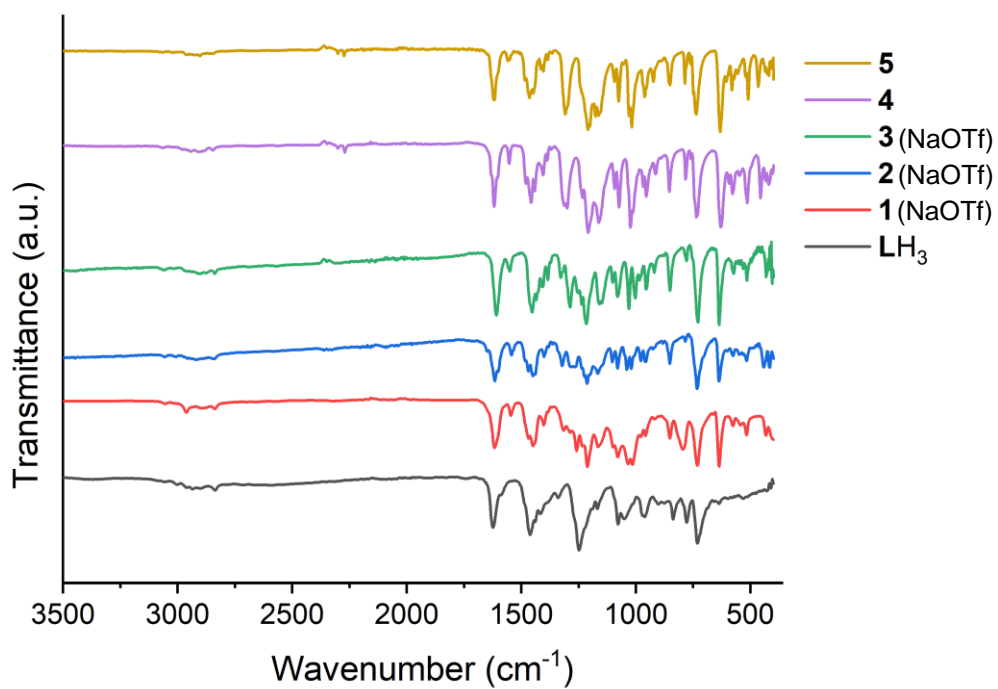

Figure S17: ATR Infrared Spectra for compounds 1–5 and LH<sub>3</sub>.

## 5. Electrochemistry for LH<sub>3</sub> and compounds 2(NaOTf), 4 and 5

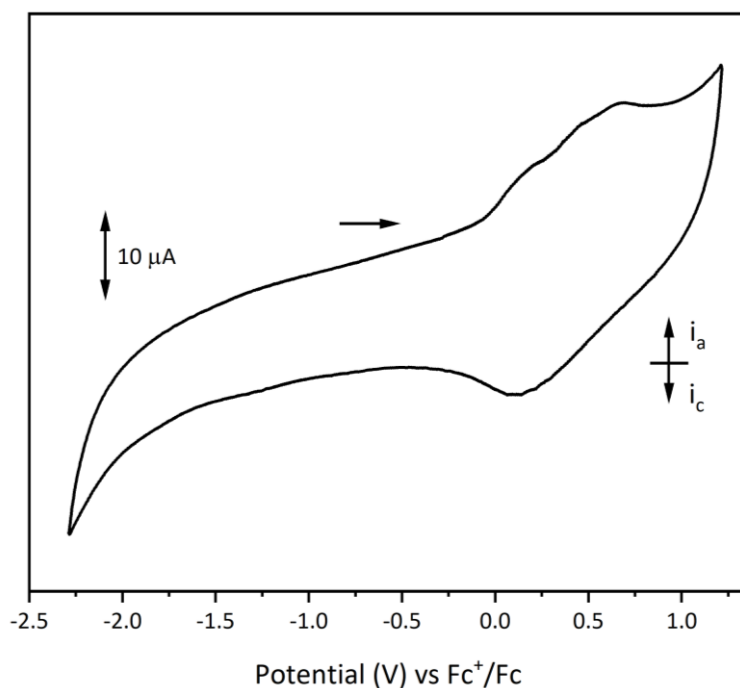

**Figure S18:** Cyclic voltammogram for compound LH<sub>3</sub> at 5 mM in CH<sub>2</sub>Cl<sub>2</sub>, with 0.25 M [(*n*Bu)<sub>4</sub>N][PF<sub>6</sub>] supporting electrolyte, glassy carbon working and counter electrodes, vs Fc<sup>+</sup>/Fc, 0.1 Vs<sup>-1</sup>, scanning oxidatively. *i*<sub>a</sub> = peak anodic current, *i*<sub>c</sub> = peak cathodic current. A Savitzky-Golay smooth was applied to even out periodic noise in the trace.

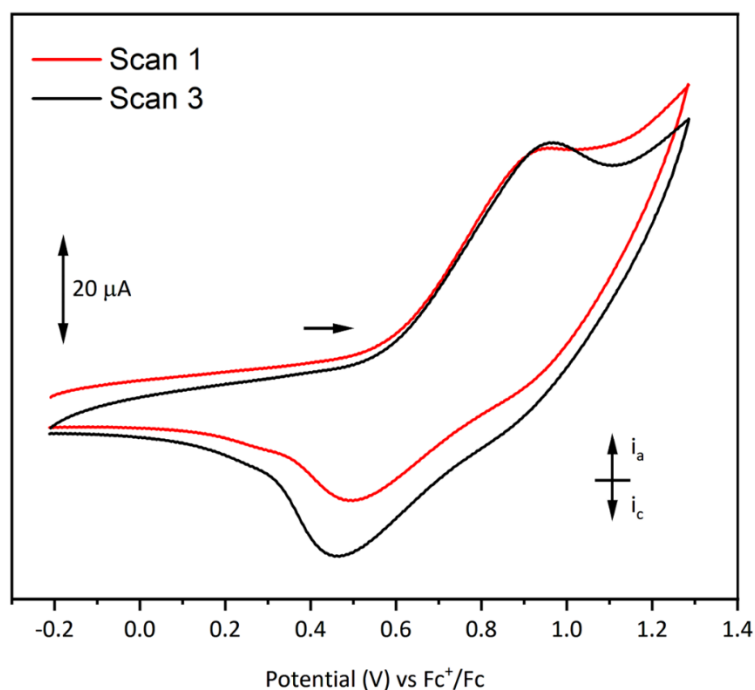

**Figure S19:** Cyclic voltammogram for compound 2(NaOTf) at 6.6 mM in CH<sub>2</sub>Cl<sub>2</sub>, with 0.2 M [(*n*Bu)<sub>4</sub>N][PF<sub>6</sub>] supporting electrolyte, glassy carbon working and counter electrodes, vs Fc<sup>+</sup>/Fc, 0.1 Vs<sup>-1</sup>, scanning oxidatively. *i*<sub>a</sub> = peak anodic current, *i*<sub>c</sub> = peak cathodic current.

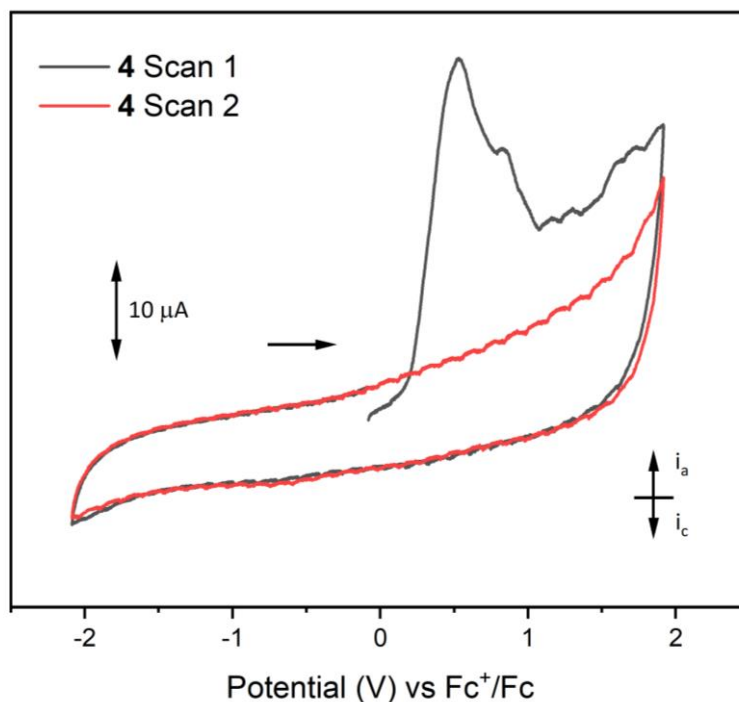

**Figure S20:** Cyclic voltammogram for compound **4** at 13.3 mM in  $\text{CH}_2\text{Cl}_2$ , with 0.20 M  $[(n\text{Bu})_4\text{N}][\text{PF}_6]$  supporting electrolyte, glassy carbon working and counter electrodes, vs  $\text{Fc}^+/\text{Fc}$ ,  $0.2 \text{ Vs}^{-1}$ , scanning oxidatively.  $i_a$  = peak anodic current,  $i_c$  = peak cathodic current. A Savitzky-Golay smooth was applied to even out periodic noise in the trace.

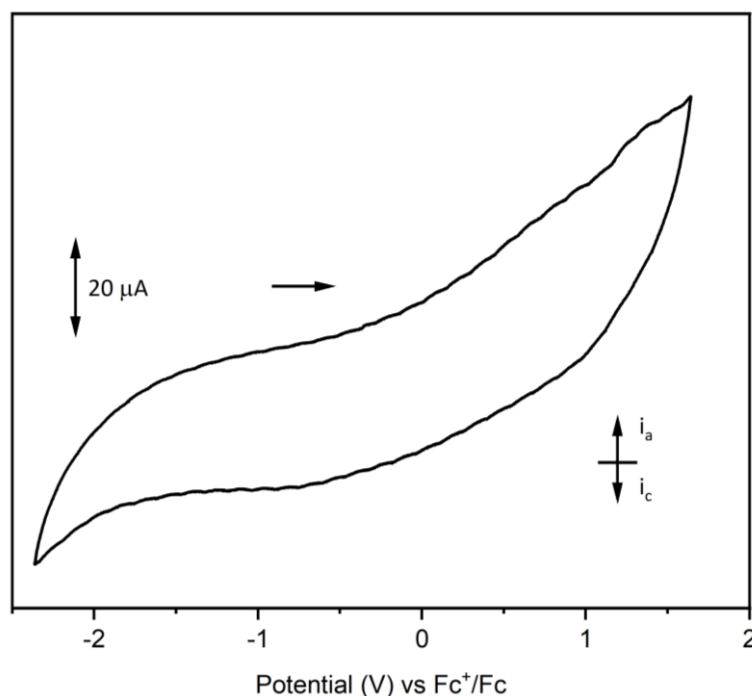

**Figure S21:** Cyclic voltammogram for compound **5** at 8.5 mM in  $\text{CH}_2\text{Cl}_2$ , with 0.20 M  $[(n\text{Bu})_4\text{N}][\text{PF}_6]$  supporting electrolyte, glassy carbon working and counter electrodes, vs  $\text{Fc}^+/\text{Fc}$ ,  $0.2 \text{ Vs}^{-1}$ , scanning oxidatively.  $i_a$  = peak anodic current,  $i_c$  = peak cathodic current. A Savitzky-Golay smooth was applied to even out periodic noise in the trace.

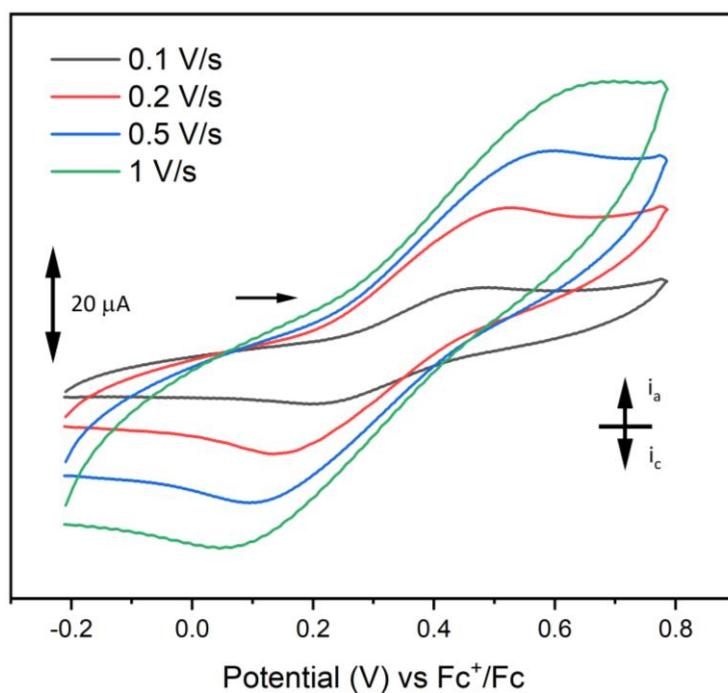

**Figure S22:** Cyclic voltammogram displaying scan rate dependence of the  $\text{Mn}^{2+/3+}$  redox couple in **4** at 0.33 V at 7.1 mM in  $\text{CH}_2\text{Cl}_2$ , with 0.20 M  $[(n\text{Bu})_4\text{N}][\text{PF}_6]$  supporting electrolyte, glassy carbon working and counter electrodes, vs  $\text{Fc}^+/\text{Fc}$ , scanning oxidatively.  $i_a$  = peak anodic current,  $i_c$  = peak cathodic current. A Savitzky-Golay smooth was applied to even out periodic noise in the trace.

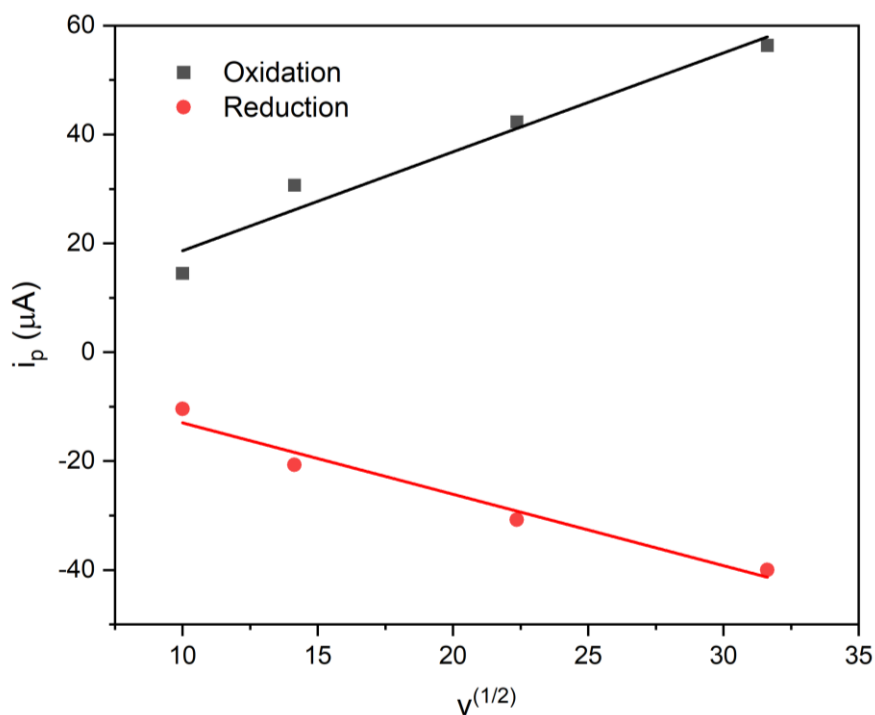

**Figure S23:** Randles Ševčík plot for the  $\text{Mn}^{2+/3+}$  redox couple of compound **4** at 0.33 V.  $v$  denotes scan rate and  $i_p$  is peak current.

## 6. Evan's magnetometry for compounds **1**(NaOTf), **2**(NaOTf), **4** and **5**

**General method:** a  $d_3$ -MeCN NMR sample of each compound (**1**(NaOTf), **2**(NaOTf), **4** and **5**) with known concentration was prepared. To this NMR sample, a sealed glass reference capillary containing MeCN was added, and a standard  $^1\text{H}$  NMR spectroscopic experiment was run. The difference in chemical shift ( $\Delta\delta$ ) between the residual signals of MeCN and  $d_3$ -MeCN was used to estimate the effective magnetic moment ( $\mu_{\text{eff}}$ ) of each complex.<sup>1, 2</sup>

- The measured molar magnetic susceptibility,  $\chi_{\text{meas}}$  was calculated from the equation

$$\chi_{\text{meas}} = \frac{3\Delta\delta}{4\pi f c}$$

where  $f$  denotes frequency of the spectrometer (in this case 400 MHz),  $\Delta\delta$  denotes difference in chemical shift between the residual signals of MeCN and  $d_3$ -MeCN, and  $c$  denotes the concentration of the sample (in mol  $\text{cm}^{-3}$ ).

- $\chi_{\text{P}}$ , the paramagnetic contribution to the magnetic susceptibility was calculated using

$$\chi_{\text{P}} = \chi_{\text{meas}} - \chi_{\text{D}}$$

where the diamagnetic component,  $\chi_{\text{D}}$ , was estimated using the Pascal's constants.<sup>3</sup>

- $\mu_{\text{eff}}$  was then calculated with the following equation

$$\mu_{\text{eff}} = \sqrt{8\chi_{\text{P}}T}$$

where  $T$  denotes temperature (298 K in all cases)

**Table S1:** Evans magnetometry data

| Compound         | $\Delta\delta$ (Hz) | $c$ (mol $\text{cm}^{-3}$ ) | $\chi_{\text{D}}$ (mol $\text{cm}^{-3}$ ) | $\chi_{\text{P}}$ (mol $\text{cm}^{-3}$ ) | $\mu_{\text{eff}}$ ( $\mu_{\text{B}}$ ) | $g_{\text{eff}}$ |
|------------------|---------------------|-----------------------------|-------------------------------------------|-------------------------------------------|-----------------------------------------|------------------|
| <b>1</b> (NaOTf) | 298.55              | $1.59 \times 10^{-5}$       | -0.00039192                               | $11.6 \times 10^{-3}$                     | 5.27                                    | 1.782            |
| <b>2</b> (NaOTf) | 189.97              | $1.30 \times 10^{-5}$       | -0.00038992                               | $9.13 \times 10^{-3}$                     | 4.66                                    | 2.406            |
| <b>4</b>         | 406.36              | $1.61 \times 10^{-5}$       | -0.00047841                               | $15.6 \times 10^{-3}$                     | 6.09                                    | 2.059            |
| <b>5</b>         | 143.18              | $1.17 \times 10^{-5}$       | -0.00047641                               | $7.77 \times 10^{-3}$                     | 4.31                                    | 2.226            |

These values were compared to the expected spin only magnetic moment, given by

$$\mu_{\text{SO}} = \sqrt{n(n+2)} \mu_{\text{B}}$$

where  $n$  is the number of unpaired electrons.

The results for compounds **4** and **5** are broadly in agreement with the EPR and computational analysis which are consistent with  $S = 5/2$  for compound **4** and  $S = 3/2$  for compound **5**. For compound **4**  $\mu_{\text{eff}} = 6.09$  implies between five and six unpaired electrons are present ( $\mu_{\text{SO}} = 5.92$  and  $6.93 \mu_{\text{B}}$  respectively), whilst for **5**  $\mu_{\text{eff}} = 4.31$  implies between three and four unpaired electrons are present ( $\mu_{\text{SO}} = 3.87$  and  $4.90 \mu_{\text{B}}$  respectively), supporting the conclusions of EPR and computational analysis. As detailed in the Materials and Methods section, the simulation of the CW-EPR spectrum of **5** was performed by imposing a constraint on the 'true'  $g$  values, namely  $(g_1+g_2+g_3)/3$  was forced to be equal to  $g_{\text{eff}} = 2.226$ , obtained from  $\mu_{\text{eff}}$  using the equation

$$\mu_{\text{eff}} = g_{\text{eff}}\sqrt{S(S+1)} \mu_{\text{B}}$$

The  $\mu_{\text{eff}}$  value for **2**(NaOTf) implies between three and four unpaired electrons and for **1**(NaOTf) between four and five, also consistent with expected electronic structure for each compound.

## 7. Crystallographic data for compounds 1–5

### Author responses to Crystallographic Alerts from checkCIF/PLATON report

[3(NaOTf)]·MeCN: PLAT973\_ALERT\_2\_B Check Calcd Positive Resid. Density on La1 1.60 eÅ<sup>-3</sup>

There is no chemically sensible species corresponding to the residual density peak about the heavy metal lanthanum atom, and it may be a consequence of thermal restraints in the refinement.

**Table S2:** Crystal data and structure refinement for [1(NaOTf)], [2(NaOTf)] and [3(NaOTf)]·MeCN.

| Identification code                               | [1(NaOTf)]                                                                                       | [2(NaOTf)]                                                                                       | [3(NaOTf)]·MeCN                                                                    |
|---------------------------------------------------|--------------------------------------------------------------------------------------------------|--------------------------------------------------------------------------------------------------|------------------------------------------------------------------------------------|
| <b>Empirical formula</b>                          | C <sub>34</sub> H <sub>36</sub> F <sub>3</sub> MnN <sub>5</sub> Na <sub>2</sub> O <sub>9</sub> S | C <sub>30</sub> H <sub>30</sub> CoF <sub>3</sub> N <sub>3</sub> Na <sub>2</sub> O <sub>9</sub> S | C <sub>32</sub> H <sub>33</sub> F <sub>3</sub> LaN <sub>4</sub> NaO <sub>9</sub> S |
| <b>Formula weight</b>                             | 848.66                                                                                           | 770.54                                                                                           | 868.597                                                                            |
| <b>Temperature/K</b>                              | 150                                                                                              | 150                                                                                              | 150                                                                                |
| <b>Crystal system</b>                             | triclinic                                                                                        | triclinic                                                                                        | monoclinic                                                                         |
| <b>Space group</b>                                | P-1                                                                                              | P-1                                                                                              | P2 <sub>1</sub> /n                                                                 |
| <b>a/Å</b>                                        | 11.6556(5)                                                                                       | 11.7547(5)                                                                                       | 16.0670(1)                                                                         |
| <b>b/Å</b>                                        | 13.3317(5)                                                                                       | 13.2058(5)                                                                                       | 13.0765(1)                                                                         |
| <b>c/Å</b>                                        | 13.5391(6)                                                                                       | 13.4600(4)                                                                                       | 16.7696(1)                                                                         |
| <b>α/°</b>                                        | 104.826(4)                                                                                       | 104.532(3)                                                                                       | 90                                                                                 |
| <b>β/°</b>                                        | 106.697(4)                                                                                       | 106.887(3)                                                                                       | 101.815(1)                                                                         |
| <b>γ/°</b>                                        | 105.433(4)                                                                                       | 105.274(3)                                                                                       | 90                                                                                 |
| <b>Volume/Å<sup>3</sup></b>                       | 1812.26(14)                                                                                      | 1803.25(12)                                                                                      | 3448.65(4)                                                                         |
| <b>Z</b>                                          | 2                                                                                                | 2                                                                                                | 4                                                                                  |
| <b>ρ<sub>calc</sub>/g/cm<sup>3</sup></b>          | 1.555                                                                                            | 1.419                                                                                            | 1.673                                                                              |
| <b>μ/mm<sup>-1</sup></b>                          | 4.417                                                                                            | 5.115                                                                                            | 10.929                                                                             |
| <b>F(000)</b>                                     | 874.0                                                                                            | 790.0                                                                                            | 1749.8                                                                             |
| <b>Crystal size/mm<sup>3</sup></b>                | 0.70 × 0.37 × 0.34                                                                               | 0.42 × 0.24 × 0.11                                                                               | 0.32 × 0.26 × 0.14                                                                 |
| <b>Radiation</b>                                  | Cu Kα (λ = 1.54184)                                                                              | Cu Kα (λ = 1.54184)                                                                              | Cu Kα (λ = 1.54184)                                                                |
| <b>2θ range for data collection/°</b>             | 7.306 to 144.264                                                                                 | 7.342 to 144.308                                                                                 | 6.94 to 145.16                                                                     |
| <b>Index ranges</b>                               | -14 ≤ h ≤ 11,<br>-16 ≤ k ≤ 15,<br>-16 ≤ l ≤ 16                                                   | -14 ≤ h ≤ 14,<br>-16 ≤ k ≤ 16,<br>-16 ≤ l ≤ 15                                                   | -19 ≤ h ≤ 19,<br>-16 ≤ k ≤ 16,<br>-20 ≤ l ≤ 20                                     |
| <b>Reflections collected</b>                      | 12129                                                                                            | 12391                                                                                            | 59489                                                                              |
| <b>Independent reflections</b>                    | 6974 [R <sub>int</sub> = 0.0336,<br>R <sub>sigma</sub> = 0.0450]                                 | 6933 [R <sub>int</sub> = 0.0273,<br>R <sub>sigma</sub> = 0.0405]                                 | 6788 [R <sub>int</sub> = 0.0474,<br>R <sub>sigma</sub> = 0.0202]                   |
| <b>Data/restraints/parameters</b>                 | 6974/6/446                                                                                       | 6933/0/446                                                                                       | 6788/0/465                                                                         |
| <b>Goodness-of-fit on F<sup>2</sup></b>           | 1.048                                                                                            | 1.030                                                                                            | 1.053                                                                              |
| <b>Final R indexes [I &gt; 2σ (I)]</b>            | R <sub>1</sub> = 0.0504,<br>wR <sub>2</sub> = 0.1428                                             | R <sub>1</sub> = 0.0409,<br>wR <sub>2</sub> = 0.1059                                             | R <sub>1</sub> = 0.0194,<br>wR <sub>2</sub> = 0.0501                               |
| <b>Final R indexes [all data]</b>                 | R <sub>1</sub> = 0.0536,<br>wR <sub>2</sub> = 0.1473                                             | R <sub>1</sub> = 0.0452,<br>wR <sub>2</sub> = 0.1085                                             | R <sub>1</sub> = 0.0200,<br>wR <sub>2</sub> = 0.0505                               |
| <b>Largest diff. peak/hole / e Å<sup>-3</sup></b> | 0.88/-0.55                                                                                       | 0.34/-0.34                                                                                       | 0.32/-0.93                                                                         |



**Table S3:** Crystal data and structure refinement for **4** and **5**.

| Identification code                               | <b>4</b>                                                                                         | <b>5</b>                                                                                         |
|---------------------------------------------------|--------------------------------------------------------------------------------------------------|--------------------------------------------------------------------------------------------------|
| <b>Empirical formula</b>                          | C <sub>33</sub> H <sub>33</sub> F <sub>6</sub> LaMnN <sub>4</sub> O <sub>12</sub> S <sub>2</sub> | C <sub>33</sub> H <sub>33</sub> CoF <sub>6</sub> LaN <sub>4</sub> O <sub>12</sub> S <sub>2</sub> |
| <b>Formula weight</b>                             | 1049.60                                                                                          | 1053.611                                                                                         |
| <b>Temperature/K</b>                              | 150                                                                                              | 150                                                                                              |
| <b>Crystal system</b>                             | monoclinic                                                                                       | monoclinic                                                                                       |
| <b>Space group</b>                                | P2 <sub>1</sub> /n                                                                               | P2 <sub>1</sub> /n                                                                               |
| <b>a/Å</b>                                        | 16.0537(2)                                                                                       | 13.4835(1)                                                                                       |
| <b>b/Å</b>                                        | 13.0153(2)                                                                                       | 12.9504(1)                                                                                       |
| <b>c/Å</b>                                        | 19.0750(2)                                                                                       | 22.0541(2)                                                                                       |
| <b>α/°</b>                                        | 90                                                                                               | 90                                                                                               |
| <b>β/°</b>                                        | 99.7480(10)                                                                                      | 93.320(1)                                                                                        |
| <b>γ/°</b>                                        | 90                                                                                               | 90                                                                                               |
| <b>Volume/Å<sup>3</sup></b>                       | 3928.06(9)                                                                                       | 3844.55(5)                                                                                       |
| <b>Z</b>                                          | 4                                                                                                | 4                                                                                                |
| <b>ρ<sub>calc</sub>/cm<sup>3</sup></b>            | 1.775                                                                                            | 1.820                                                                                            |
| <b>μ/mm<sup>-1</sup></b>                          | 12.745                                                                                           | 13.729                                                                                           |
| <b>F(000)</b>                                     | 2092.0                                                                                           | 2099.6                                                                                           |
| <b>Crystal size/mm<sup>3</sup></b>                | 0.46 × 0.35 × 0.29                                                                               | 0.264 × 0.185 × 0.155                                                                            |
| <b>Radiation</b>                                  | Cu Kα (λ = 1.54184)                                                                              | Cu Kα (λ = 1.54184)                                                                              |
| <b>2θ range for data collection/°</b>             | 6.664 to 143.94                                                                                  | 7.5 to 145.08                                                                                    |
| <b>Index ranges</b>                               | -19 ≤ h ≤ 19,<br>-15 ≤ k ≤ 11,<br>-23 ≤ l ≤ 21                                                   | -16 ≤ h ≤ 16,<br>-16 ≤ k ≤ 16,<br>-26 ≤ l ≤ 24                                                   |
| <b>Reflections collected</b>                      | 14963                                                                                            | 71163                                                                                            |
| <b>Independent reflections</b>                    | 7564 [R <sub>int</sub> = 0.0342,<br>R <sub>sigma</sub> = 0.0442]                                 | 7553 [R <sub>int</sub> = 0.0415,<br>R <sub>sigma</sub> = 0.0180]                                 |
| <b>Data/restraints/parameters</b>                 | 7564/0/537                                                                                       | 7553/0/537                                                                                       |
| <b>Goodness-of-fit on F<sup>2</sup></b>           | 1.044                                                                                            | 1.066                                                                                            |
| <b>Final R indexes<br/>[I ≥ 2σ (I)]</b>           | R <sub>1</sub> = 0.0360,<br>wR <sub>2</sub> = 0.0911                                             | R <sub>1</sub> = 0.0218,<br>wR <sub>2</sub> = 0.0542                                             |
| <b>Final R indexes<br/>[all data]</b>             | R <sub>1</sub> = 0.0393,<br>wR <sub>2</sub> = 0.0939                                             | R <sub>1</sub> = 0.0227,<br>wR <sub>2</sub> = 0.0548                                             |
| <b>Largest diff. peak/hole / e Å<sup>-3</sup></b> | 0.89/-1.49                                                                                       | 0.53/-1.00                                                                                       |

## 8. Computational Details

Geometry optimizations, frequency calculations, and Natural Bond Order calculations were performed using the Gaussian program package (versions 9 and 16).<sup>4</sup> Optimized geometries in a variety of spin states (**4**:  $S=1/2$ ,  $S=5/2$ ; **5**:  $S=1/2$ ,  $S=3/2$ ), and were calculated in the gas phase from coordinates derived from the X-ray crystal structures. In each case, only the high-spin multiplicities resulted in convergence (and modification of the convergence criteria (e.g. scf=qc, as well as single point calculations on already-optimised high spin configurations) was unsuccessful). Computational methodology was evaluated against the bond metrics taken from single crystal X-ray data for **5**. (summarised in Table S5). The functional and basis sets are outlined in Table S4, along with their replication of X-ray structure bonding parameters with a particular focus on Co–La bond distance. The best replication of bonding parameters was found to be the B3LYP function in combination with def2SVPP(C, H)/def2TZVP(N, O, F, S)/def2TZVPP(La, Mn/Co)<sup>5, 6</sup> along with Grimme's empirical dispersion correction (gd3)<sup>7</sup> used on all atoms. The calculated structures were confirmed to be minima based on the absence of imaginary frequencies from frequency calculations on the optimized geometries. Natural bond order analysis was performed using NBO version 6.0.<sup>8</sup>

Time-dependent (TD) DFT calculations were performed on the optimized structures of **LH<sub>3</sub>**, **4** and **5** with def2SVPP(C, H)/def2TZVP(N, O, F, S)/def2TZVPP(La, Mn/Co)<sup>5, 6</sup> in acetonitrile as solvent, using 50 (**LH<sub>3</sub>**) or 60 (**4**, **5**) roots. The visible regions of the spectra were well-reproduced for **LH<sub>3</sub>**, **4** and **5**. For the optimized structure of **4**, excited states 19 and 21 (351 and 342 nm respectively) reproduce the absorbance at 341 nm well and are comprised of 10 and 8 transitions respectively (Table S7). 346.25 nm. For the optimized structure of **5**, excited states 21 and 24 (352 and 346 nm respectively) reproduce the absorbance at 340 nm well and are each comprised of 12 transitions (Table S8).

**Table S4:** Methodology development summary.

| Functional | Basis Set |            |           | Modifier | Co-La   | $\Delta_{\text{calc-exp}}$ |
|------------|-----------|------------|-----------|----------|---------|----------------------------|
|            | H, C      | N, O, F, S | Co, La    |          |         |                            |
| PBE1       | 3-21G     | 3-21G      | LANL2DZ   |          | 3.4529  | 0.0902                     |
| B3LYP      | 3-21G     | 3-21G      | LANL2DZ   |          | 3.423   | 0.0603                     |
| B3LYP      | Def2SVPP  | Def2TZVP   | Def2TZVPP |          | 3.42424 | 0.06154                    |
| B3LYP      | Def2SVPP  | Def2TZVP   | Def2TZVPP | GD3      | 3.37548 | 0.01278                    |
| B3LYP      | Def2SVPP  | Def2TZVPP  | LANL2DZ   |          | 3.4381  | 0.0754                     |

**Table S5:** Comparison of crystallographic and computational bond lengths for complexes **4** and **5**.

<sup>a</sup>Where ESD values are quoted for average distances, the highest value is reported. <sup>b</sup>B3LYP-GD3/(Mn/Co/La: def2TZVPP; N/O/F/S: def2TZVP; C/H: def2SVPP basis sets).

| Complex              |                            | Distances (Å) <sup>a</sup>                   |                    |                    |                                    |          |
|----------------------|----------------------------|----------------------------------------------|--------------------|--------------------|------------------------------------|----------|
|                      |                            | $\kappa^6\text{-N}_3\text{O}_3$ binding site |                    |                    | $\kappa^6\text{-O}_6$ binding site |          |
|                      |                            | M...La                                       | M-N <sub>avg</sub> | M-O <sub>avg</sub> | La-O <sub>avg</sub>                |          |
|                      |                            |                                              |                    |                    | phenolate                          | methoxy  |
| <b>4</b><br>(M = Mn) | Experimental               | 3.398(1)                                     | 2.192(3)           | 2.157(2)           | 2.446(2)                           | 2.725(3) |
|                      | Computational <sup>b</sup> | 3.41                                         | 2.220              | 2.153              | 2.508                              | 2.743    |
| <b>5</b><br>(M = Co) | Experimental               | 3.363(1)                                     | 2.103(2)           | 2.097(2)           | 2.432(2)                           | 2.715(2) |
|                      | Computational <sup>b</sup> | 3.38                                         | 2.147              | 2.118              | 2.464                              | 2.735    |

|     | Atom | 1      | 2      |     | Atom | 1      | 2         |
|-----|------|--------|--------|-----|------|--------|-----------|
| 1.  | La   | 0.0000 | 0.1511 | 1.  | La   | 0.0000 | 0.2408    |
| 2.  | Mn   | 0.1511 | 0.0000 | 2.  | Mn   | 0.2408 | 0.0000 -  |
| 3.  | S    | 0.0230 | 0.0004 | 3.  | S    | 0.0717 | -0.0000   |
| 4.  | S    | 0.0417 | 0.0015 | 4.  | S    | 0.1643 | -0.0001 - |
| 5.  | F    | 0.0064 | 0.0002 | 5.  | F    | 0.0084 | -0.0000 - |
| 6.  | F    | 0.0064 | 0.0002 | 6.  | F    | 0.0085 | -0.0000 - |
| 7.  | F    | 0.0024 | 0.0001 | 7.  | F    | 0.0008 | -0.0000 - |
| 8.  | O    | 0.1712 | 0.0019 | 8.  | O    | 0.3242 | 0.0001 -  |
| 9.  | O    | 0.2489 | 0.2014 | 9.  | O    | 0.4377 | 0.3047 -  |
| 10. | O    | 0.2661 | 0.2201 | 10. | O    | 0.4631 | 0.3154 -  |
| 11. | O    | 0.1714 | 0.0019 | 11. | O    | 0.3220 | 0.0007 -  |
| 12. | O    | 0.1647 | 0.0028 | 12. | O    | 0.3044 | 0.0042    |
| 13. | O    | 0.2563 | 0.2152 | 13. | O    | 0.4536 | 0.3115 -  |
| 14. | F    | 0.0029 | 0.0002 | 14. | F    | 0.0012 | 0.0000    |
| 15. | O    | 0.3190 | 0.0015 | 15. | O    | 0.5085 | 0.0011    |
| 16. | F    | 0.0187 | 0.0004 | 16. | F    | 0.0292 | 0.0001    |
| 17. | O    | 0.0197 | 0.0003 | 17. | O    | 0.0280 | 0.0000    |
| 18. | O    | 0.0205 | 0.0001 | 18. | O    | 0.0297 | -0.0000   |
| 19. | O    | 0.0285 | 0.0006 | 19. | O    | 0.0327 | 0.0001 -  |
| 20. | F    | 0.0031 | 0.0003 | 20. | F    | 0.0018 | -0.0000   |
| 21. | O    | 0.2829 | 0.0013 | 21. | O    | 0.4550 | 0.0009    |
| 22. | N    | 0.0109 | 0.2433 | 22. | N    | 0.0269 | 0.3157    |
| 23. | O    | 0.2634 | 0.0068 | 23. | O    | 0.4267 | 0.0169 -  |
| 24. | N    | 0.0137 | 0.2573 | 24. | N    | 0.0308 | 0.3290    |
| 25. | N    | 0.0120 | 0.2503 | 25. | N    | 0.0279 | 0.3208    |
| 26. | N    | 0.2910 | 0.0063 | 26. | N    | 0.4338 | 0.0092    |
| 27. | C    | 0.0142 | 0.0193 | 27. | C    | 0.0696 | 0.0171 -  |
| 28. | C    | 0.0146 | 0.0104 | 28. | C    | 0.0578 | 0.0225 -  |
| 29. | C    | 0.0117 | 0.0096 | 29. | C    | 0.0428 | 0.0231 -  |
| 30. | C    | 0.0127 | 0.0092 | 30. | C    | 0.0302 | -0.0114 - |

**Figure S24:** Select Wiberg bond order values for La, Mn and surrounding atoms for **4**. Right: Select Natural atomic orbital (NAO) bond order values for La, Mn and surrounding atoms for **4**.

|     | Atom | 1      | 2      |     | Atom | 1      | 2       |
|-----|------|--------|--------|-----|------|--------|---------|
| 1.  | La   | 0.0000 | 0.0256 | 1.  | La   | 0.0000 | 0.3087  |
| 2.  | Co   | 0.0256 | 0.0000 | 2.  | Co   | 0.3087 | 0.0000  |
| 3.  | S    | 0.0059 | 0.0003 | 3.  | S    | 0.0849 | 0.0021  |
| 4.  | S    | 0.0054 | 0.0001 | 4.  | S    | 0.0759 | -0.0000 |
| 5.  | F    | 0.0012 | 0.0000 | 5.  | F    | 0.0057 | -0.0000 |
| 6.  | F    | 0.0006 | 0.0000 | 6.  | F    | 0.0004 | -0.0000 |
| 7.  | F    | 0.0009 | 0.0001 | 7.  | F    | 0.0035 | -0.0000 |
| 8.  | F    | 0.0010 | 0.0000 | 8.  | F    | 0.0049 | -0.0000 |
| 9.  | F    | 0.0010 | 0.0000 | 9.  | F    | 0.0051 | -0.0000 |
| 10. | F    | 0.0004 | 0.0000 | 10. | F    | 0.0004 | -0.0000 |
| 11. | O    | 0.0661 | 0.0417 | 11. | O    | 0.4496 | 0.2550  |
| 12. | O    | 0.0394 | 0.0004 | 12. | O    | 0.3025 | -0.0003 |
| 13. | O    | 0.0656 | 0.0347 | 13. | O    | 0.4451 | 0.2184  |
| 14. | O    | 0.0408 | 0.0005 | 14. | O    | 0.3059 | 0.0012  |
| 15. | O    | 0.0635 | 0.0431 | 15. | O    | 0.4390 | 0.2595  |
| 16. | O    | 0.0406 | 0.0004 | 16. | O    | 0.3091 | -0.0004 |
| 17. | O    | 0.0783 | 0.0005 | 17. | O    | 0.4947 | 0.0028  |
| 18. | O    | 0.0096 | 0.0011 | 18. | O    | 0.0600 | 0.0085  |
| 19. | O    | 0.0074 | 0.0001 | 19. | O    | 0.0430 | 0.0004  |
| 20. | O    | 0.0754 | 0.0003 | 20. | O    | 0.4877 | 0.0005  |
| 21. | O    | 0.0060 | 0.0000 | 21. | O    | 0.0368 | 0.0000  |
| 22. | O    | 0.0065 | 0.0000 | 22. | O    | 0.0393 | 0.0000  |
| 23. | N    | 0.0031 | 0.0550 | 23. | N    | 0.0348 | 0.3112  |
| 24. | N    | 0.0028 | 0.0495 | 24. | N    | 0.0345 | 0.2787  |
| 25. | N    | 0.0027 | 0.0508 | 25. | N    | 0.0293 | 0.2868  |
| 26. | N    | 0.0715 | 0.0007 | 26. | N    | 0.4374 | 0.0023  |
| 27. | C    | 0.0000 | 0.0004 | 27. | C    | 0.0001 | 0.0047  |
| 28. | H    | 0.0000 | 0.0000 | 28. | H    | 0.0000 | 0.0001  |
| 29. | H    | 0.0000 | 0.0000 | 29. | H    | 0.0000 | 0.0001  |
| 30. | H    | 0.0000 | 0.0000 | 30. | H    | 0.0000 | 0.0001  |

**Figure S25:** Select Wiberg bond order values for La, Co and surrounding atoms for **5**. Right: Select Natural atomic orbital (NAO) bond order values for La, Co and surrounding atoms for **5**.

## Coordinates for 4

|    |             |             |             |   |             |             |             |
|----|-------------|-------------|-------------|---|-------------|-------------|-------------|
| La | -0.79150200 | -0.05726100 | -0.13178600 | C | -2.29778600 | 3.16494800  | -4.08355200 |
| Mn | 2.59992500  | 0.19377900  | -0.42989100 | H | -3.35600400 | 3.36427300  | -3.84437300 |
| S  | -4.60990600 | 0.63525200  | -0.01733500 | H | -2.22850600 | 2.76233100  | -5.10832800 |
| S  | -1.45977300 | -3.18727200 | 0.55612900  | H | -1.72872300 | 4.10858100  | -4.02919600 |
| F  | -4.76671900 | 2.14599300  | -2.21100000 | C | 5.78318000  | 0.34154700  | -0.72898000 |
| F  | -4.48177000 | 3.28142000  | -0.37580400 | C | 5.16804600  | 1.52630500  | -1.53734500 |
| F  | -6.42492800 | 2.40714000  | -0.82377800 | C | 2.11319000  | -3.36930000 | -3.93305800 |
| O  | -1.28910000 | -1.62160100 | -2.26761200 | C | 3.93534700  | 0.05341100  | 2.47807200  |
| O  | 1.03868200  | 1.69723200  | -0.58944200 | C | 2.40109700  | 4.98245100  | 0.30735500  |
| O  | 1.07416700  | -0.77868300 | -1.55622200 | C | 2.67797600  | -0.09399700 | 3.18622200  |
| O  | -0.93670900 | -0.09684700 | 2.58504000  | C | 2.23332800  | -2.34395000 | -2.95657000 |
| O  | -0.96588900 | 2.57531600  | 0.84519200  | C | 0.87466900  | -3.81269900 | -4.35782000 |
| O  | 1.28953600  | -0.20100900 | 1.23291300  | C | -1.76307700 | 2.20420500  | -3.12833300 |
| F  | -0.58850500 | -4.99181300 | 2.28535600  | C | -1.36899500 | -3.90322700 | 2.27780100  |
| O  | -3.13950900 | 0.67934200  | -0.20682100 | C | -2.19209900 | -0.17511600 | 3.27864700  |
| F  | -0.85023800 | -3.00971200 | 3.14290100  | C | 7.31245100  | 0.40861000  | -0.91616400 |
| O  | -4.99086200 | 0.86260700  | 1.35490100  | C | 3.56538200  | -1.98426800 | -2.51229200 |
| O  | -5.25777300 | -0.40756900 | -0.76357300 | C | 5.32683000  | -1.04085400 | -1.26965500 |
| O  | -1.90697500 | -4.27803400 | -0.26231900 | C | 0.29597900  | -0.13298200 | 4.70873500  |
| F  | -2.59057700 | -4.24433500 | 2.71200200  | C | 2.71400000  | -0.10271400 | 4.60630100  |
| O  | -2.38339500 | -2.04498200 | 0.68276100  | C | -2.03867200 | 2.99838700  | 1.69476300  |
| N  | 3.83578800  | 1.90323500  | -1.09360600 | C | -2.62176000 | -2.03078200 | -2.62659300 |
| O  | -0.10790300 | -2.67541500 | 0.31238800  | C | 5.50718100  | 0.48192600  | 0.78858500  |
| N  | 3.90527900  | -1.14391500 | -1.59641600 | C | 1.55234600  | -0.13220200 | 5.35559100  |
| N  | 4.13370800  | 0.17314400  | 1.21068300  | H | 7.73873400  | 1.28905400  | -0.40312800 |
| N  | -1.35818300 | 1.45245500  | -2.36240000 | H | 5.85678900  | 2.39325400  | -1.47629300 |
| C  | 1.17820400  | 2.88284700  | -0.07649400 | H | 5.93632600  | -1.29139700 | -2.16015800 |
| C  | -0.21179500 | -2.24019000 | -2.87169000 | H | 3.31347400  | 5.57544800  | 0.18355700  |
| C  | 0.09617700  | 3.44426200  | 0.67335100  | H | 6.22007800  | -0.16918600 | 1.33057000  |
| C  | 2.37203200  | 3.65899200  | -0.20502400 | H | 0.79411900  | -4.61011500 | -5.10093100 |
| C  | 3.59988400  | 3.12407000  | -0.76664500 | H | 1.34995800  | 6.53734000  | 1.36926100  |
| C  | -0.30158400 | -3.24849800 | -3.81601100 | H | 5.73848000  | 1.52466500  | 1.07913500  |
| C  | 0.23213200  | -0.12702500 | 3.32597900  | H | -2.79679800 | -1.83488600 | -3.69918900 |
| C  | 1.31531400  | 5.51841600  | 0.97510400  | H | 7.57612100  | 0.47942800  | -1.98658300 |
| C  | 0.15751400  | 4.73406800  | 1.17733600  | H | 4.42133300  | 3.86153800  | -0.86133600 |
| C  | 1.05396100  | -1.75122500 | -2.42699100 | H | -1.27439400 | -3.62219200 | -4.13759400 |
| C  | 1.41673600  | -0.14892600 | 2.52547500  | H | 5.55948500  | -1.79681400 | -0.49574200 |
| C  | -5.10512000 | 2.20553200  | -0.90147700 | H | -2.53599100 | 3.89060900  | 1.27855400  |

|   |             |             |             |   |             |             |             |
|---|-------------|-------------|-------------|---|-------------|-------------|-------------|
| H | -1.65857300 | 3.21052300  | 2.71042400  | H | 1.59419900  | -0.14311900 | 6.44765100  |
| H | 4.37236000  | -2.53781200 | -3.03016600 | H | -0.61520700 | -0.14044600 | 5.30847900  |
| H | 3.02441100  | -3.82029900 | -4.33929300 | H | -2.76634600 | -3.09674500 | -2.38832100 |
| H | 3.68657700  | -0.07406800 | 5.10847200  | H | -2.24524400 | -1.10541800 | 3.86629700  |
| H | -0.67850300 | 5.15520600  | 1.73731500  | H | 4.81488700  | 0.11519200  | 3.14850400  |
| H | -2.76441600 | 2.17736900  | 1.72386200  | H | -2.32023700 | 0.70354700  | 3.93478000  |
| H | 7.80308800  | -0.49254100 | -0.50652900 | H | -2.97761000 | -0.18262700 | 2.51138400  |
| H | 5.10959500  | 1.22217200  | -2.59830800 | H | -3.30917300 | -1.42883500 | -2.01471500 |

## Coordinates for 5

|    |             |             |             |   |             |             |             |
|----|-------------|-------------|-------------|---|-------------|-------------|-------------|
| La | -0.78318900 | -0.27739600 | -0.35525600 | H | 5.54691500  | -1.91401500 | 0.79965400  |
| Co | 2.59083500  | -0.18132500 | -0.37988900 | H | 6.05927500  | -0.43565500 | 1.64601300  |
| S  | -0.37545900 | 2.92626400  | 1.45140900  | C | 3.51789200  | 2.46881200  | -1.59812300 |
| S  | -4.45968200 | -1.24516400 | -0.77183200 | H | 4.31655200  | 3.19922700  | -1.82346800 |
| F  | -1.56854400 | 4.77814700  | -0.04362000 | C | 2.21688500  | 2.85773300  | -2.08788300 |
| F  | -0.93807700 | 5.47743600  | 1.92103600  | C | 2.08139700  | 4.14424100  | -2.67204600 |
| F  | -2.69331200 | 4.20149200  | 1.72915600  | H | 2.96742300  | 4.78136800  | -2.75761300 |
| F  | -5.82981700 | 0.38975000  | 0.80654600  | C | 0.85246000  | 4.60783200  | -3.10147400 |
| F  | -5.36586500 | -1.54355600 | 1.69536700  | H | 0.75344600  | 5.60810000  | -3.53045700 |
| F  | -6.92759600 | -1.38551700 | 0.18198700  | C | -0.29316700 | 3.79311200  | -2.96915500 |
| O  | 1.11090800  | 0.82409400  | -1.45345100 | H | -1.26214600 | 4.17711600  | -3.29042200 |
| O  | -1.23297100 | 1.64325000  | -2.24288400 | C | -0.18132100 | 2.52595800  | -2.42326000 |
| O  | 1.13374100  | -1.70852800 | -0.93438700 | C | 1.07376600  | 2.02570000  | -1.96812400 |
| O  | -0.84550200 | -2.96705100 | 0.21879400  | C | -2.56850700 | 2.14307600  | -2.39663000 |
| O  | 1.17932200  | -0.14321900 | 1.15501200  | H | -2.75099400 | 2.44202700  | -3.44411300 |
| O  | -1.14228200 | -0.46135400 | 2.33905500  | H | -2.73442400 | 2.99652900  | -1.71717800 |
| O  | -1.13054700 | 1.96544300  | 0.60086100  | H | -3.24734900 | 1.31755200  | -2.13489300 |
| O  | 0.89768400  | 3.30595200  | 0.89592600  | C | 3.73841900  | -2.87098600 | -1.35182300 |
| O  | -0.43881800 | 2.60861000  | 2.85627200  | H | 4.60918800  | -3.49446000 | -1.63173600 |
| O  | -3.24907500 | -0.66768800 | -0.13551700 | C | 2.56594300  | -3.61697500 | -0.93055800 |
| O  | -4.90276500 | -0.50132000 | -1.92713000 | C | 2.67714000  | -5.01194900 | -0.70639600 |
| O  | -4.40508400 | -2.68334000 | -0.89411500 | H | 3.62579100  | -5.51126900 | -0.93042800 |
| N  | 3.84910200  | 1.40980200  | -0.93955400 | C | 1.61689100  | -5.73865100 | -0.18967600 |
| N  | 3.87697700  | -1.59318900 | -1.36283100 | H | 1.71244800  | -6.81342200 | -0.01501300 |
| N  | 3.98119800  | -0.59648000 | 1.25894200  | C | 0.40539700  | -5.08845100 | 0.13752100  |
| N  | -1.63924400 | -1.47282000 | -2.67021600 | H | -0.41292200 | -5.66649800 | 0.57014700  |
| C  | 7.28266000  | -0.16714200 | -0.60114400 | C | 0.27075500  | -3.72805000 | -0.09085200 |
| H  | 7.60069300  | 0.13364500  | -1.61558200 | C | 1.32861400  | -2.96567000 | -0.67075800 |
| H  | 7.70756900  | -1.16578700 | -0.39402700 | C | -1.89763800 | -3.58355200 | 0.97167800  |
| H  | 7.72622100  | 0.54551800  | 0.11739800  | H | -2.63451000 | -2.79705500 | 1.17534700  |
| C  | 5.74814500  | -0.18370700 | -0.48727900 | H | -1.49885200 | -3.98894500 | 1.91860600  |
| C  | 5.25104600  | 1.28226600  | -0.54475900 | H | -2.38539200 | -4.37654800 | 0.38071700  |
| H  | 5.37576000  | 1.73124100  | 0.45802600  | C | 3.72162000  | -0.62459800 | 2.51791700  |
| H  | 5.89354000  | 1.85405000  | -1.24134100 | H | 4.56732900  | -0.75350900 | 3.21998600  |
| C  | 5.18297300  | -1.03128200 | -1.66924700 | C | 2.42612800  | -0.57079400 | 3.16286200  |
| H  | 5.08862000  | -0.38339000 | -2.55772600 | C | 2.37252400  | -0.76094300 | 4.56723400  |
| H  | 5.90465300  | -1.83591600 | -1.91197200 | H | 3.31116200  | -0.86860800 | 5.12056800  |
| C  | 5.37427400  | -0.82369100 | 0.86749000  | C | 1.16317200  | -0.82226600 | 5.23691900  |



|   |             |             |            |   |             |             |             |
|---|-------------|-------------|------------|---|-------------|-------------|-------------|
| H | 1.13198700  | -0.95962400 | 6.32073600 | H | -3.06749300 | 0.19001800  | 2.13845700  |
| C | -0.04254600 | -0.71843700 | 4.51278500 | C | -1.45584600 | 4.43466500  | 1.25589100  |
| H | -0.99544000 | -0.77934000 | 5.04094700 | C | -5.72820300 | -0.92328300 | 0.55498800  |
| C | -0.01406700 | -0.53360500 | 3.14036400 | C | -2.45763900 | -1.96063300 | -3.31217100 |
| C | 1.21704700  | -0.40401800 | 2.43506400 | C | -3.54354600 | -2.56578600 | -4.06650700 |
| C | -2.36551000 | -0.01910300 | 2.95595800 | H | -3.15886500 | -3.08687500 | -4.95925700 |
| H | -2.17483100 | 0.90145300  | 3.52976200 | H | -4.25716800 | -1.77843900 | -4.36107100 |
| H | -2.78228600 | -0.81494200 | 3.59833000 | H | -4.07156800 | -3.27249000 | -3.40399000 |

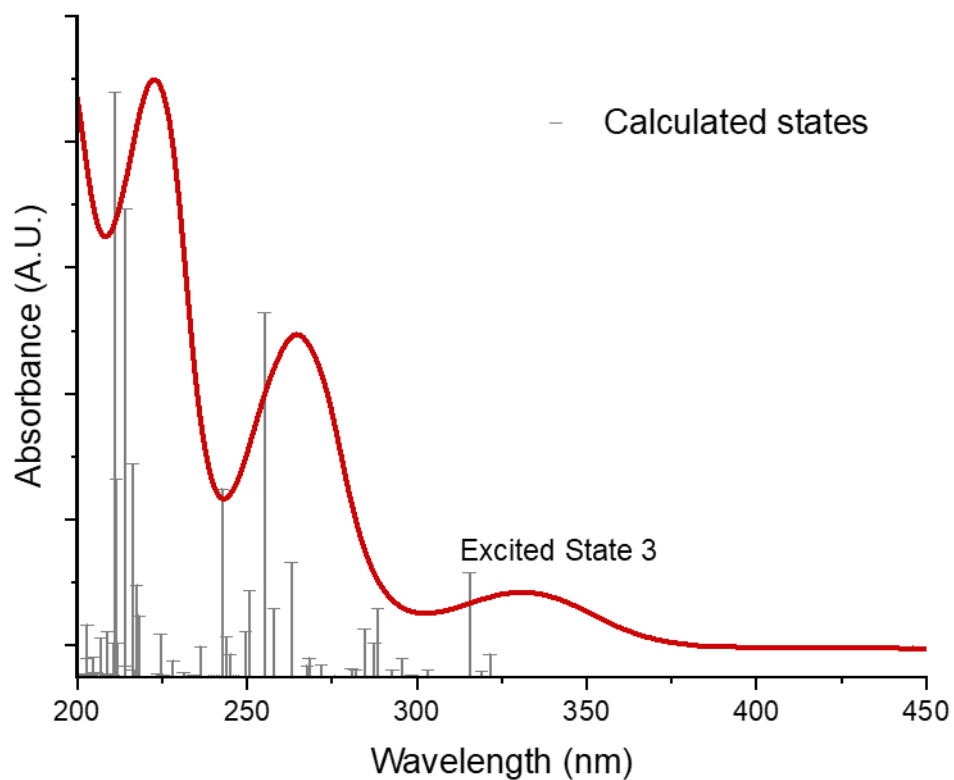

**Figure S26:** Normalized experimental vs computed (B3LYP-GD3/(N/O: def2TZVP; C/H: def2SVPP basis sets)) absorption spectra of  $\text{LH}_3$ .

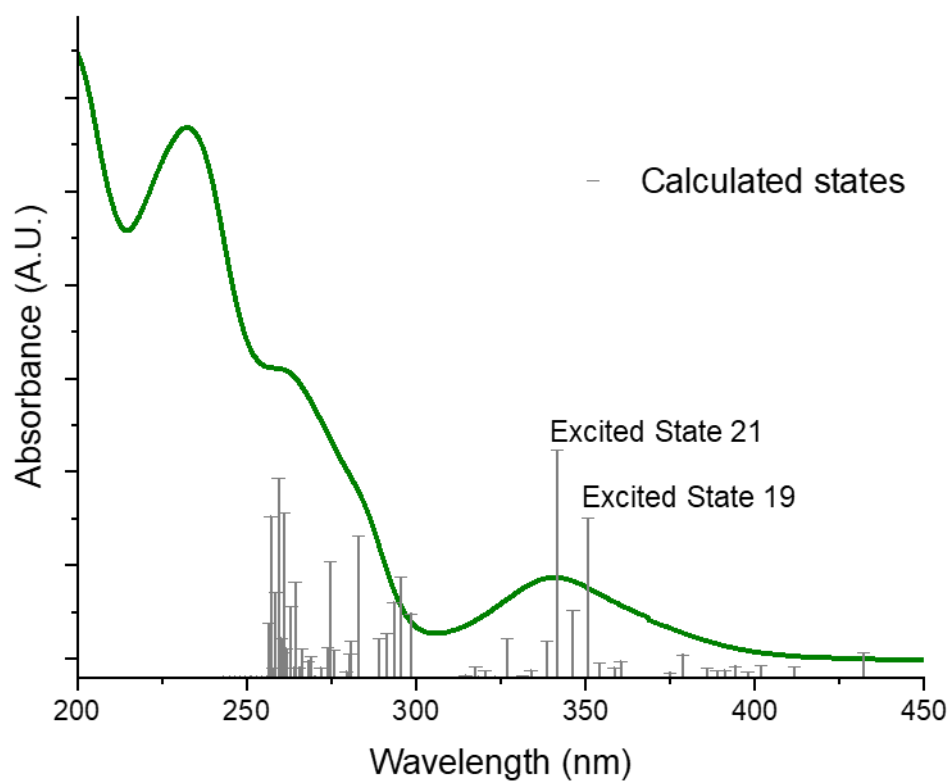

**Figure S27:** Normalized experimental vs computed (B3LYP-GD3/(Mn/La: def2TZVPP; N/O/F/S: def2TZVP; C/H: def2SVPP basis sets)) absorption spectra of compound **4**.

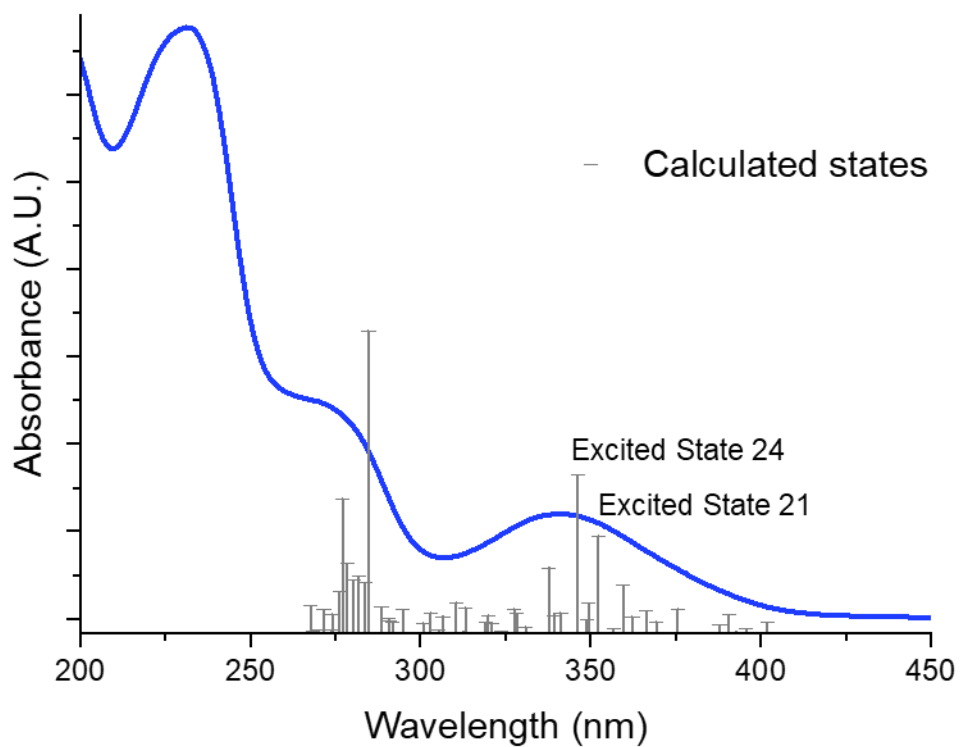

**Figure S28:** Normalized experimental vs computed (B3LYP-GD3/(Co/La: def2TZVPP; N/O/F/S: def2TZVPP; C/H: def2SVPP basis sets)) absorption spectra of compound **5**.

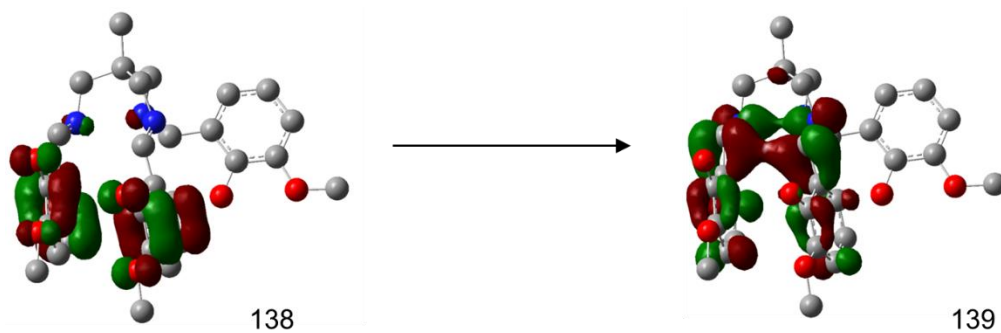

**Figure S29:** LH<sub>3</sub> natural transition orbitals for excited state 3 (orbital 138 (HOMO) and orbital 139 (LUMO) exhibit the largest occupations).

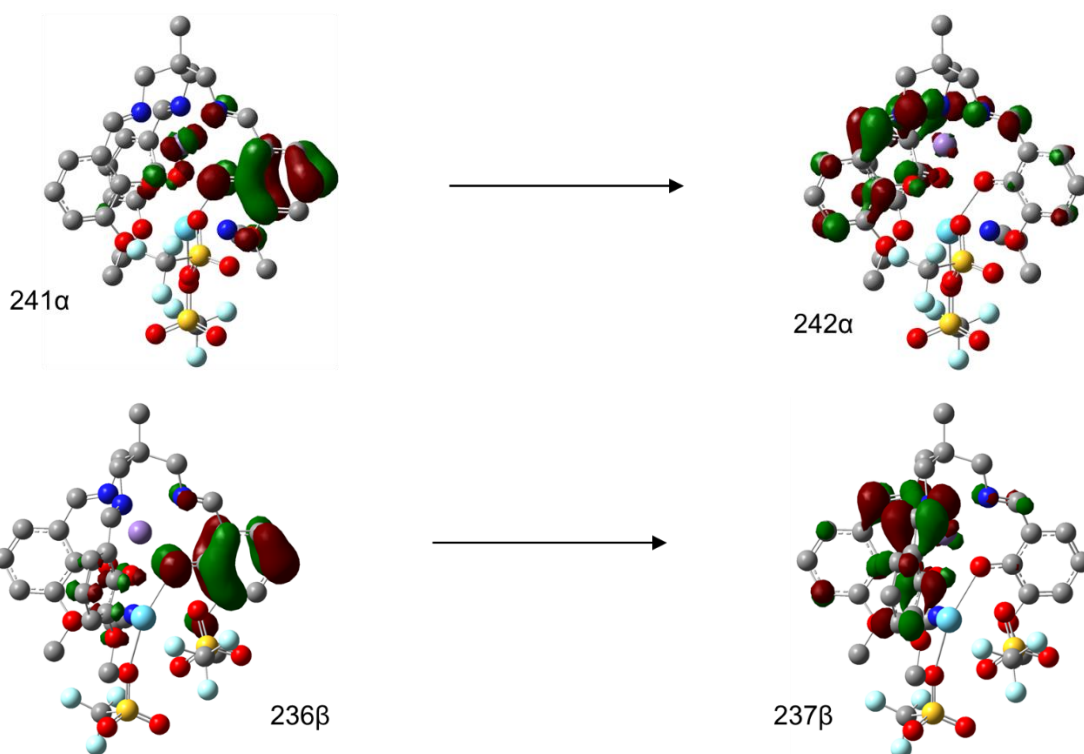

**Figure S30:** Complex 4 natural transition orbitals for excited state 19 (orbitals 236 $\beta$ , 237 $\beta$ , 241 $\alpha$  and 242 $\alpha$  exhibit the largest occupations).

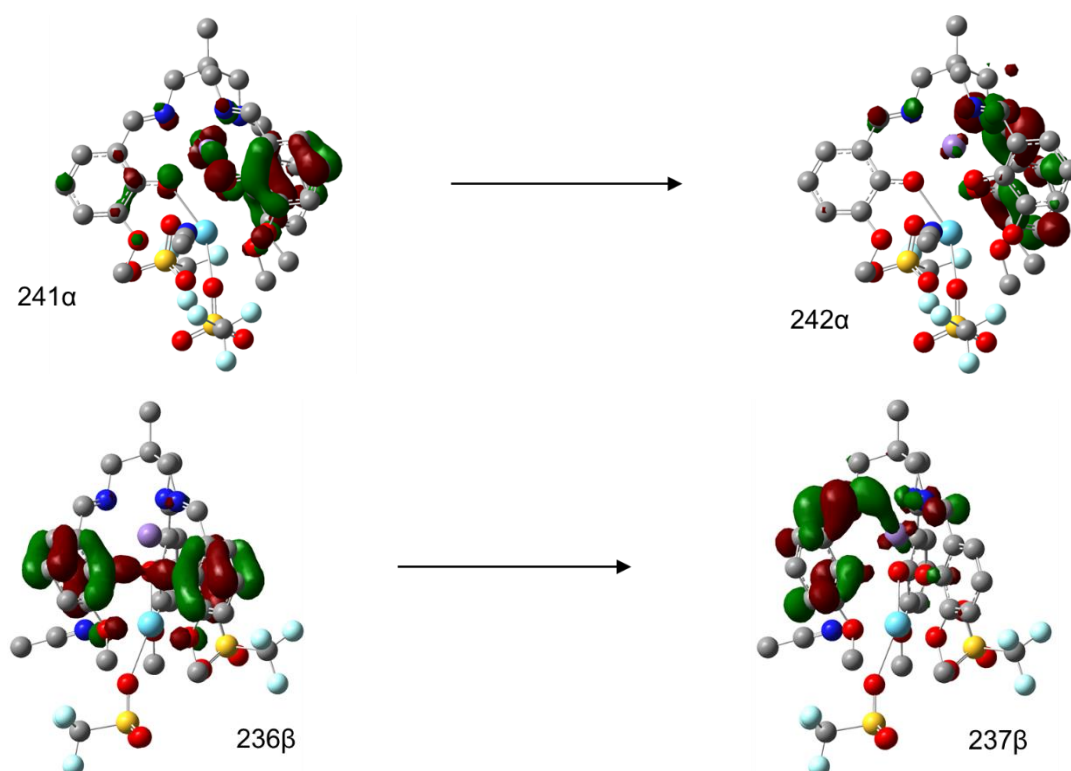

**Figure S31:** Complex 4 natural transition orbitals for excited state 21 (orbitals 236 $\beta$ , 237 $\beta$ , 241 $\alpha$  and 242 $\alpha$  exhibit the largest occupations).

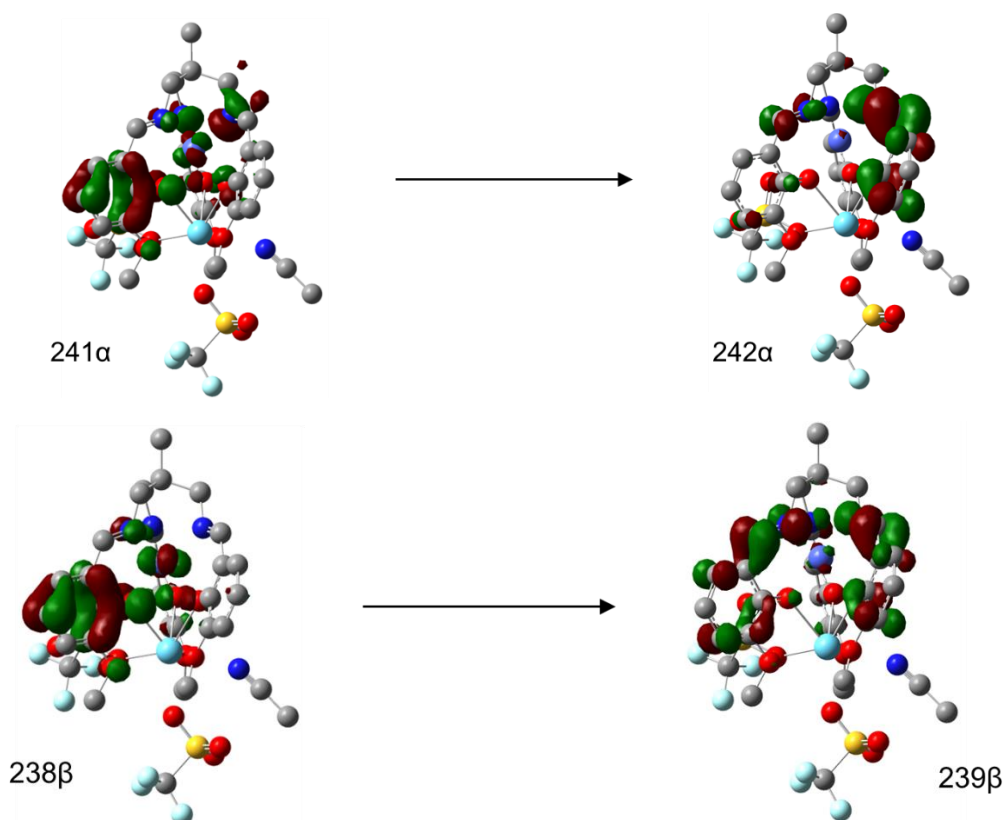

**Figure S32:** Complex 5 natural transition orbitals for excited state 21 (orbitals 238 $\beta$ , 239 $\beta$ , 241 $\alpha$  and 242 $\alpha$  exhibit the largest occupations).

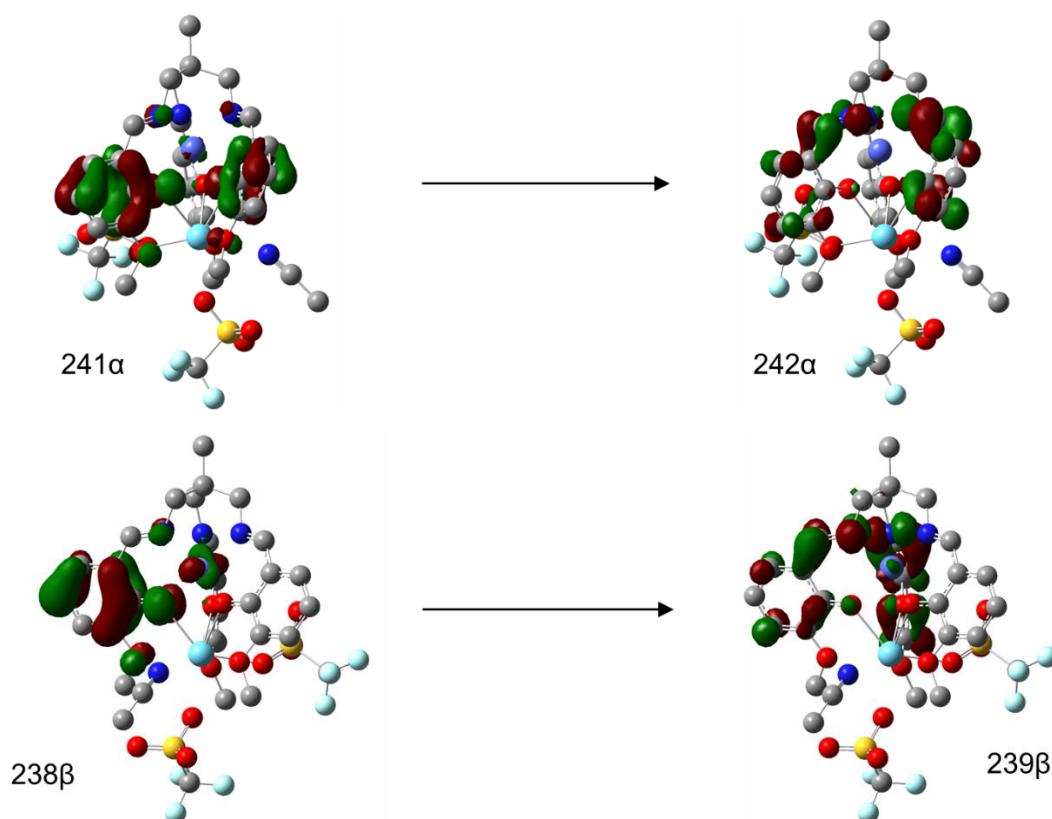

**Figure S33:** Complex 5 natural transition orbitals for excited state 24 (orbitals 238 $\beta$ , 239 $\beta$ , 241 $\alpha$  and 242 $\alpha$  exhibit the largest occupations).

**Table S6:** Selection of excitation wavelengths, oscillator strengths and orbital contributions calculated via time-dependent density functional theory for compound LH<sub>3</sub>: B3LYP-GD3/(N/O: def2TZVP; C/H: def2SVPP basis sets), NStates = 50. Only excited states with oscillator strengths > 0.01 are shown.

| Excited state | Peak information |                     | Orbital contributions |       |             |            |
|---------------|------------------|---------------------|-----------------------|-------|-------------|------------|
|               | $\lambda$ / nm   | Oscillator strength | initial               | final | coefficient | percentage |
| 1             | 321.57           | 0.0194              | 134                   | 139   | -0.19295    | 7.45 %     |
|               |                  |                     | 135                   | 139   | -0.31166    | 19.43 %    |
|               |                  |                     | 136                   | 139   | 0.20326     | 8.26 %     |
|               |                  |                     | 138                   | 139   | 0.51945     | 53.97 %    |
| 3             | 315.59           | 0.0893              | 134                   | 139   | -0.19295    | 7.45 %     |
|               |                  |                     | 135                   | 139   | -0.31166    | 19.43 %    |
|               |                  |                     | 136                   | 139   | 0.20326     | 8.26 %     |
|               |                  |                     | 138                   | 139   | 0.51945     | 53.97 %    |
| 6             | 295.76           | 0.0152              | 130                   | 139   | -0.10337    | 2.14 %     |
|               |                  |                     | 134                   | 139   | -0.29519    | 17.43 %    |
|               |                  |                     | 134                   | 140   | -0.15942    | 5.08 %     |
|               |                  |                     | 135                   | 139   | 0.42899     | 36.81 %    |
|               |                  |                     | 135                   | 140   | -0.15161    | 4.60 %     |
|               |                  |                     | 136                   | 139   | 0.36629     | 26.83 %    |
| 8             | 288.41           | 0.0579              | 137                   | 141   | 0.27871     | 15.54 %    |
|               |                  |                     | 138                   | 140   | -0.15525    | 4.82 %     |
|               |                  |                     | 138                   | 141   | 0.58236     | 67.83 %    |
| 9             | 187.49           | 0.0285              | 137                   | 140   | -0.11910    | 2.84 %     |
|               |                  |                     | 137                   | 141   | 0.59162     | 70.00 %    |
|               |                  |                     | 138                   | 141   | -0.30763    | 18.93 %    |
| 10            | 284.63           | 0.0407              | 132                   | 142   | 0.10571     | 2.23 %     |
|               |                  |                     | 134                   | 140   | 0.10863     | 2.36 %     |
|               |                  |                     | 135                   | 140   | 0.30785     | 18.95 %    |
|               |                  |                     | 136                   | 139   | 0.15661     | 4.91 %     |
|               |                  |                     | 136                   | 140   | 0.50782     | 51.58 %    |
|               |                  |                     | 138                   | 140   | -0.17927    | 6.43 %     |
| 15            | 268.38           | 0.0161              | 130                   | 139   | -0.14570    | 4.25 %     |
|               |                  |                     | 132                   | 139   | -0.13716    | 3.76 %     |
|               |                  |                     | 133                   | 139   | -0.37529    | 28.17 %    |
|               |                  |                     | 133                   | 141   | -0.15070    | 4.54 %     |
|               |                  |                     | 134                   | 139   | 0.10366     | 2.15 %     |
|               |                  |                     | 134                   | 141   | 0.50730     | 51.47 %    |
| 17            | 263.10           | 0.0979              | 130                   | 139   | 0.41880     | 35.08 %    |
|               |                  |                     | 131                   | 141   | 0.21275     | 9.05 %     |
|               |                  |                     | 132                   | 139   | 0.12936     | 3.35 %     |
|               |                  |                     | 132                   | 141   | -0.13825    | 3.82 %     |
|               |                  |                     | 133                   | 139   | -0.19252    | 7.41 %     |
|               |                  |                     | 133                   | 141   | 0.17774     | 6.32 %     |
|               |                  |                     | 134                   | 139   | -0.14408    | 4.15 %     |
|               |                  |                     | 134                   | 140   | -0.10730    | 2.30 %     |
|               |                  |                     | 134                   | 141   | 0.14209     | 4.04 %     |
|               |                  |                     | 135                   | 141   | 0.30511     | 18.62 %    |
| 18            | 257.90           | 0.0587              | 130                   | 139   | -0.14420    | 4.16 %     |
|               |                  |                     | 131                   | 139   | 0.50401     | 50.81 %    |
|               |                  |                     | 132                   | 139   | 0.32836     | 21.56 %    |
|               |                  |                     | 133                   | 139   | -0.25434    | 12.94 %    |
|               |                  |                     | 134                   | 141   | -0.15668    | 4.91 %     |
| 19            | 255.14           | 0.3112              | 131                   | 141   | 0.20918     | 8.75 %     |
|               |                  |                     | 132                   | 139   | 0.38867     | 30.21 %    |
|               |                  |                     | 132                   | 141   | -0.14958    | 4.47 %     |
|               |                  |                     | 133                   | 139   | 0.22239     | 9.89 %     |
|               |                  |                     | 133                   | 140   | -0.12129    | 2.94 %     |
|               |                  |                     | 133                   | 141   | 0.13334     | 3.56 %     |
|               |                  |                     | 134                   | 141   | 0.28282     | 16.00 %    |
|               |                  |                     | 135                   | 141   | -0.25725    | 13.24 %    |
| 20            | 250.71           | 0.0742              | 130                   | 139   | 0.39080     | 30.54 %    |
|               |                  |                     | 131                   | 139   | 0.14415     | 4.16 %     |
|               |                  |                     | 131                   | 141   | -0.20766    | 8.62 %     |

|    |        |        |     |     |          |         |
|----|--------|--------|-----|-----|----------|---------|
|    |        |        | 132 | 139 | 0.11632  | 2.71 %  |
|    |        |        | 132 | 140 | 0.13378  | 3.58 %  |
|    |        |        | 132 | 141 | 0.20598  | 8.49 %  |
|    |        |        | 133 | 139 | 0.10181  | 2.07 %  |
|    |        |        | 133 | 140 | -0.14920 | 4.45 %  |
|    |        |        | 133 | 141 | -0.36672 | 26.90 % |
| 21 | 249.62 | 0.0392 | 130 | 139 | 0.13160  | 3.46 %  |
|    |        |        | 131 | 140 | 0.37651  | 28.35 % |
|    |        |        | 132 | 140 | -0.34909 | 24.37 % |
|    |        |        | 133 | 140 | 0.39380  | 31.02 % |
|    |        |        | 133 | 141 | -0.16493 | 5.44 %  |
| 22 | 245.30 | 0.0194 | 130 | 141 | -0.12762 | 3.26 %  |
|    |        |        | 131 | 140 | 0.12166  | 2.96 %  |
|    |        |        | 131 | 141 | -0.15505 | 4.81 %  |
|    |        |        | 132 | 140 | -0.33351 | 22.25 % |
|    |        |        | 132 | 141 | 0.34213  | 23.41 % |
|    |        |        | 133 | 140 | -0.22816 | 10.41 % |
|    |        |        | 133 | 141 | 0.34544  | 23.87 % |
|    |        |        | 134 | 141 | 0.10632  | 2.26 %  |
| 23 | 243.90 | 0.0337 | 131 | 141 | -0.10469 | 2.19 %  |
|    |        |        | 132 | 140 | 0.30967  | 19.18 % |
|    |        |        | 132 | 141 | 0.23382  | 10.93 % |
|    |        |        | 133 | 140 | 0.46818  | 43.84 % |
|    |        |        | 133 | 141 | 0.26667  | 14.22 % |
|    |        |        | 134 | 141 | 0.10340  | 2.14 %  |
| 24 | 242.71 | 0.1607 | 130 | 140 | -0.34198 | 23.39 % |
|    |        |        | 131 | 140 | 0.43480  | 37.81 % |
|    |        |        | 132 | 140 | 0.22509  | 10.13 % |
|    |        |        | 133 | 139 | -0.11104 | 2.47 %  |
|    |        |        | 133 | 141 | 0.11061  | 2.45 %  |
|    |        |        | 134 | 140 | -0.22054 | 9.73 %  |
|    |        |        | 134 | 141 | -0.10614 | 2.25 %  |
|    |        |        | 136 | 142 | -0.11774 | 2.77 %  |
| 25 | 236.32 | 0.0260 | 130 | 140 | 0.54809  | 60.08 % |
|    |        |        | 131 | 140 | 0.27992  | 15.67 % |
|    |        |        | 132 | 140 | 0.24655  | 12.16 % |
|    |        |        | 136 | 142 | -0.15804 | 5.00 %  |
| 29 | 228.29 | 0.0137 | 137 | 143 | 0.48185  | 46.44 % |
|    |        |        | 137 | 144 | 0.32402  | 21.00 % |
|    |        |        | 138 | 143 | -0.25717 | 13.23 % |
|    |        |        | 138 | 144 | -0.28096 | 15.79 % |
| 31 | 224.60 | 0.0362 | 134 | 142 | 0.36195  | 26.20 % |
|    |        |        | 135 | 142 | 0.45675  | 41.72 % |
|    |        |        | 135 | 143 | 0.13268  | 3.52 %  |
|    |        |        | 136 | 142 | -0.26789 | 14.35 % |
|    |        |        | 137 | 142 | 0.18027  | 6.50 %  |
| 34 | 218.21 | 0.0521 | 129 | 139 | 0.13491  | 3.64 %  |
|    |        |        | 135 | 143 | 0.22128  | 9.79 %  |
|    |        |        | 135 | 144 | -0.20499 | 8.40 %  |
|    |        |        | 136 | 143 | 0.35731  | 25.53 % |
|    |        |        | 136 | 144 | 0.36125  | 26.10 % |
|    |        |        | 137 | 144 | -0.24018 | 11.54 % |
|    |        |        | 138 | 143 | -0.13029 | 3.40 %  |
|    |        |        | 138 | 144 | -0.11574 | 2.68 %  |
| 35 | 217.70 | 0.0785 | 129 | 139 | -0.20281 | 8.23 %  |
|    |        |        | 135 | 143 | 0.22559  | 10.18 % |
|    |        |        | 135 | 144 | 0.36029  | 25.96 % |
|    |        |        | 136 | 142 | 0.14101  | 3.98 %  |
|    |        |        | 136 | 143 | 0.37003  | 27.38 % |
|    |        |        | 137 | 144 | 0.25241  | 12.74 % |
|    |        |        | 138 | 143 | 0.11848  | 2.81 %  |
| 37 | 216.39 | 0.1823 | 129 | 139 | 0.28630  | 16.39 % |
|    |        |        | 134 | 142 | 0.11318  | 2.56 %  |
|    |        |        | 134 | 143 | 0.11934  | 2.85 %  |
|    |        |        | 135 | 143 | 0.12258  | 3.01 %  |
|    |        |        | 135 | 144 | 0.36113  | 26.08 % |

|    |        |        |     |     |          |         |
|----|--------|--------|-----|-----|----------|---------|
|    |        |        | 136 | 142 | 0.14609  | 4.27 %  |
|    |        |        | 136 | 144 | -0.21816 | 9.52 %  |
|    |        |        | 137 | 144 | -0.29353 | 17.23 % |
|    |        |        | 138 | 143 | -0.19798 | 7.84 %  |
| 38 | 214.37 | 0.4000 | 134 | 143 | -0.19330 | 7.47 %  |
|    |        |        | 135 | 142 | 0.29918  | 17.90 % |
|    |        |        | 135 | 144 | -0.13911 | 3.87 %  |
|    |        |        | 136 | 142 | 0.48250  | 46.56 % |
| 40 | 211.89 | 0.0285 | 129 | 139 | -0.15590 | 4.86 %  |
|    |        |        | 131 | 142 | -0.20168 | 8.13 %  |
|    |        |        | 132 | 142 | -0.29978 | 17.97 % |
|    |        |        | 133 | 142 | 0.14838  | 4.40 %  |
|    |        |        | 134 | 142 | -0.13337 | 3.56 %  |
|    |        |        | 135 | 142 | 0.11297  | 2.55 %  |
|    |        |        | 135 | 143 | -0.10005 | 2.00 %  |
|    |        |        | 135 | 144 | 0.10067  | 2.03 %  |
|    |        |        | 135 | 145 | 0.12857  | 3.31 %  |
|    |        |        | 136 | 143 | -0.16590 | 5.50 %  |
|    |        |        | 136 | 144 | 0.16361  | 5.35 %  |
|    |        |        | 136 | 145 | 0.37126  | 27.57 % |
|    |        |        | 138 | 144 | -0.12556 | 3.15 %  |
| 41 | 211.53 | 0.1685 | 129 | 139 | 0.47529  | 45.18 % |
|    |        |        | 136 | 144 | 0.14235  | 4.05 %  |
|    |        |        | 136 | 145 | 0.13943  | 3.89 %  |
|    |        |        | 137 | 143 | 0.12712  | 3.23 %  |
|    |        |        | 137 | 144 | 0.16891  | 5.71 %  |
|    |        |        | 138 | 143 | 0.19866  | 7.89 %  |
|    |        |        | 138 | 144 | 0.26367  | 13.90 % |
| 42 | 211.15 | 0.4998 | 129 | 139 | -0.27221 | 14.82 % |
|    |        |        | 136 | 142 | -0.14195 | 4.03 %  |
|    |        |        | 136 | 144 | 0.10773  | 2.32 %  |
|    |        |        | 137 | 143 | 0.34123  | 23.29 % |
|    |        |        | 137 | 144 | -0.25534 | 13.04 % |
|    |        |        | 138 | 144 | 0.34836  | 24.27 % |
| 43 | 210.82 | 0.0283 | 132 | 142 | 0.13625  | 3.71 %  |
|    |        |        | 135 | 143 | -0.11105 | 2.47 %  |
|    |        |        | 135 | 144 | 0.32028  | 20.52 % |
|    |        |        | 136 | 143 | -0.23120 | 10.69 % |
|    |        |        | 136 | 144 | 0.48209  | 46.48 % |
|    |        |        | 136 | 145 | -0.18826 | 7.09 %  |
| 44 | 208.84 | 0.0390 | 133 | 143 | 0.14814  | 4.39 %  |
|    |        |        | 134 | 143 | 0.15721  | 4.94 %  |
|    |        |        | 134 | 144 | 0.60766  | 73.85 % |
|    |        |        | 137 | 147 | -0.10337 | 2.14 %  |
|    |        |        | 138 | 150 | -0.10550 | 2.23 %  |
| 45 | 207.05 | 0.0328 | 132 | 143 | 0.16065  | 5.16 %  |
|    |        |        | 133 | 143 | 0.47382  | 44.90 % |
|    |        |        | 133 | 144 | -0.15335 | 4.70 %  |
|    |        |        | 134 | 144 | -0.19581 | 7.67 %  |
|    |        |        | 137 | 146 | 0.20029  | 8.02 %  |
|    |        |        | 137 | 147 | -0.18476 | 6.83 %  |
|    |        |        | 137 | 148 | -0.11612 | 2.70 %  |
|    |        |        | 138 | 146 | -0.21639 | 9.36 %  |
| 46 | 204.72 | 0.0171 | 133 | 143 | 0.25323  | 12.83 % |
|    |        |        | 137 | 146 | -0.28603 | 16.36 % |
|    |        |        | 137 | 147 | -0.12026 | 2.89 %  |
|    |        |        | 137 | 149 | 0.11978  | 2.87 %  |
|    |        |        | 138 | 145 | -0.12667 | 3.21 %  |
|    |        |        | 138 | 146 | 0.50918  | 51.85 % |
|    |        |        | 138 | 147 | 0.10090  | 2.04 %  |
| 49 | 203.00 | 0.0445 | 131 | 143 | -0.29229 | 17.09 % |
|    |        |        | 131 | 144 | -0.13053 | 3.41 %  |
|    |        |        | 132 | 143 | 0.43002  | 36.98 % |
|    |        |        | 132 | 144 | 0.27048  | 14.63 % |
|    |        |        | 133 | 144 | 0.21668  | 9.39 %  |
|    |        |        | 138 | 147 | -0.13506 | 3.65 %  |



|    |        |        |     |     |          |         |
|----|--------|--------|-----|-----|----------|---------|
|    |        |        | 138 | 150 | -0.11531 | 2.66 %  |
| 50 | 202.78 | 0.0151 | 131 | 143 | 0.17798  | 6.34 %  |
|    |        |        | 131 | 144 | 0.10442  | 2.18 %  |
|    |        |        | 132 | 143 | -0.18546 | 6.88 %  |
|    |        |        | 133 | 142 | 0.12059  | 2.91 %  |
|    |        |        | 133 | 143 | 0.20813  | 8.66 %  |
|    |        |        | 133 | 144 | 0.48749  | 47.53 % |
|    |        |        | 134 | 144 | -0.10449 | 2.18 %  |
|    |        |        | 137 | 146 | 0.16281  | 5.30 %  |
|    |        |        | 137 | 147 | 0.10754  | 2.31 %  |
|    |        |        | 138 | 147 | -0.10554 | 2.23 %  |

**Table S7:** Selection of excitation wavelengths, oscillator strengths and orbital contributions calculated via time-dependent density functional theory for compound **4**: B3LYP-GD3/(Mn/La: def2TZVPP; N/O/F/S: def2TZVP; C/H: def2SVPP basis sets), NStates = 60. Only excited states with oscillator strengths > 0.01 are shown.

| Excited state | Peak information |                     | Orbital contributions |        |             |            |
|---------------|------------------|---------------------|-----------------------|--------|-------------|------------|
|               | $\lambda$ / nm   | Oscillator strength | initial               | final  | coefficient | percentage |
| 6             | 432.07           | 0.0102              | 237A                  | 242A   | 0.16067     | 5.16 %     |
|               |                  |                     | 237A                  | 243A   | 0.21165     | 8.96 %     |
|               |                  |                     | 237A                  | 244A   | 0.14935     | 4.46 %     |
|               |                  |                     | 239A                  | 242A   | 0.26003     | 13.52 %    |
|               |                  |                     | 239A                  | 243A   | 0.39664     | 31.46 %    |
|               |                  |                     | 239A                  | 244A   | 0.37066     | 27.48 %    |
|               |                  |                     | 240A                  | 242A   | -0.11372    | 2.59 %     |
|               |                  |                     | 241A                  | 242A   | 0.45615     | 41.61 %    |
|               |                  |                     | 241A                  | 243A   | 0.38860     | 30.20 %    |
|               |                  |                     | 234B                  | 237B   | 0.12964     | 3.36 %     |
|               |                  |                     | 236B                  | 237B   | 0.15262     | 4.66 %     |
|               |                  |                     | 236B                  | 238B   | 0.13703     | 3.76 %     |
|               |                  |                     | 236B                  | 239B   | 0.19917     | 7.93 %     |
| 19            | 350.72           | 0.0666              | 237A                  | 242A   | -0.11723    | 2.75 %     |
|               |                  |                     | 237A                  | 243A   | -0.14609    | 4.27 %     |
|               |                  |                     | 238A                  | 242A   | -0.23457    | 11.00 %    |
|               |                  |                     | 238A                  | 243A   | -0.49781    | 49.56 %    |
|               |                  |                     | 239A                  | 244A   | 0.24179     | 11.69 %    |
|               |                  |                     | 240A                  | 244A   | 0.29567     | 17.48 %    |
|               |                  |                     | 241A                  | 244A   | -0.11397    | 2.60 %     |
|               |                  |                     | 234B                  | 237B   | -0.31452    | 19.78 %    |
|               |                  |                     | 235B                  | 237B   | 0.53704     | 57.68 %    |
|               |                  |                     | 236B                  | 239B   | -0.21842    | 9.54 %     |
| 21            | 341.52           | 0.0950              | 237A                  | 242A   | 0.80463     | 129.49 %   |
|               |                  |                     | 237A                  | 243A   | 0.22307     | 9.95 %     |
|               |                  |                     | 238A                  | 242A   | 0.12858     | 3.31 %     |
|               |                  |                     | 241A                  | 242A   | -0.10754    | 2.31 %     |
|               |                  |                     | 234B                  | 237B   | -0.30413    | 18.50 %    |
|               |                  |                     | 234B                  | 239B   | -0.14036    | 3.94 %     |
|               |                  |                     | 235B                  | 238B   | -0.18841    | 7.10 %     |
|               |                  |                     | 236B                  | 239B   | -0.21444    | 9.20 %     |
|               |                  |                     | 22                    | 338.60 | 0.0152      | 237A       |
| 237A          | 244A             | 0.36226             |                       |        |             | 26.25 %    |
| 238A          | 243A             | -0.26147            |                       |        |             | 13.67 %    |
| 238A          | 244A             | -0.21507            |                       |        |             | 9.25 %     |
| 240A          | 243A             | -0.11503            |                       |        |             | 2.65 %     |
| 234B          | 238B             | 0.36566             |                       |        |             | 26.74 %    |
| 234B          | 239B             | 0.32282             |                       |        |             | 20.84 %    |
| 235B          | 237B             | -0.12967            |                       |        |             | 3.36 %     |
| 235B          | 239B             | 0.10305             |                       |        |             | 2.12 %     |
| 236B          | 239B             | -0.30052            |                       |        |             | 18.06 %    |
| 25            | 326.98           | 0.0161              | 237A                  | 243A   | -0.13674    | 3.74 %     |
|               |                  |                     | 237A                  | 244A   | 0.31567     | 19.93 %    |
|               |                  |                     | 238A                  | 242A   | -0.10112    | 2.05 %     |

|    |        |        |      |      |          |          |
|----|--------|--------|------|------|----------|----------|
|    |        |        | 238A | 244A | 0.74696  | 111.59 % |
|    |        |        | 239A | 244A | -0.14279 | 4.08 %   |
|    |        |        | 240A | 244A | 0.11268  | 2.54 %   |
|    |        |        | 234B | 238B | -0.14981 | 4.49 %   |
|    |        |        | 234B | 239B | 0.36082  | 26.04 %  |
|    |        |        | 235B | 238B | -0.16627 | 5.53 %   |
|    |        |        | 236B | 239B | -0.10332 | 2.14 %   |
| 31 | 298.47 | 0.0266 | 232A | 242A | 0.22323  | 9.97 %   |
|    |        |        | 233A | 242A | 0.16898  | 5.71 %   |
|    |        |        | 236A | 242A | 0.76782  | 117.91 % |
|    |        |        | 236A | 243A | 0.28061  | 15.75 %  |
|    |        |        | 238A | 242A | -0.10068 | 2.03 %   |
|    |        |        | 231B | 237B | -0.12291 | 3.02 %   |
|    |        |        | 233B | 237B | 0.35413  | 25.08 %  |
| 32 | 295.61 | 0.0419 | 232A | 242A | -0.19677 | 7.74 %   |
|    |        |        | 233A | 242A | 0.32704  | 21.39 %  |
|    |        |        | 235A | 242A | 0.75802  | 114.92 % |
|    |        |        | 236A | 242A | -0.18250 | 6.66 %   |
|    |        |        | 236A | 243A | 0.17318  | 6.00 %   |
|    |        |        | 236A | 244A | 0.12949  | 3.35 %   |
|    |        |        | 231B | 237B | -0.13946 | 3.89 %   |
|    |        |        | 231B | 238B | -0.12785 | 3.27 %   |
|    |        |        | 232B | 237B | -0.18506 | 6.85 %   |
|    |        |        | 233B | 237B | 0.17905  | 6.41 %   |
|    |        |        | 233B | 239B | -0.10817 | 2.34 %   |
| 33 | 293.41 | 0.0315 | 233A | 242A | -0.13714 | 3.76 %   |
|    |        |        | 233A | 243A | 0.32830  | 21.56 %  |
|    |        |        | 235A | 242A | -0.21087 | 8.89 %   |
|    |        |        | 235A | 243A | 0.60029  | 72.07 %  |
|    |        |        | 236A | 242A | -0.18106 | 6.56 %   |
|    |        |        | 236A | 243A | 0.53802  | 57.89 %  |
|    |        |        | 232B | 237B | -0.15204 | 4.62 %   |
|    |        |        | 232B | 238B | 0.14868  | 4.42 %   |
| 34 | 291.17 | 0.0183 | 232A | 242A | -0.11172 | 2.50 %   |
|    |        |        | 232A | 243A | 0.18429  | 6.79 %   |
|    |        |        | 233A | 242A | -0.19377 | 7.51 %   |
|    |        |        | 233A | 243A | -0.15172 | 4.60 %   |
|    |        |        | 234A | 242A | -0.18009 | 6.49 %   |
|    |        |        | 234A | 243A | -0.11402 | 2.60 %   |
|    |        |        | 235A | 242A | -0.11793 | 2.78 %   |
|    |        |        | 235A | 243A | -0.43096 | 37.15 %  |
|    |        |        | 235A | 244A | -0.15368 | 4.72 %   |
|    |        |        | 236A | 242A | -0.13923 | 3.88 %   |
|    |        |        | 236A | 243A | 0.30790  | 18.96 %  |
|    |        |        | 231B | 237B | 0.32535  | 21.17 %  |
|    |        |        | 232B | 237B | 0.11289  | 2.55 %   |
|    |        |        | 232B | 238B | 0.14627  | 4.28 %   |
|    |        |        | 233B | 237B | 0.52922  | 56.01 %  |
| 35 | 289.09 | 0.0161 | 232A | 243A | -0.28877 | 16.68 %  |
|    |        |        | 234A | 242A | -0.16143 | 5.21 %   |
|    |        |        | 234A | 243A | -0.21323 | 9.09 %   |
|    |        |        | 234A | 244A | -0.10163 | 2.07 %   |
|    |        |        | 235A | 243A | 0.39374  | 31.01 %  |
|    |        |        | 235A | 244A | -0.21750 | 9.46 %   |
|    |        |        | 236A | 243A | -0.36785 | 27.06 %  |
|    |        |        | 236A | 244A | 0.18165  | 6.60 %   |
|    |        |        | 229B | 237B | 0.15465  | 4.78 %   |
|    |        |        | 231B | 239B | -0.12535 | 3.14 %   |
|    |        |        | 232B | 237B | 0.26249  | 13.78 %  |
|    |        |        | 233B | 237B | 0.44147  | 38.98 %  |
|    |        |        | 233B | 238B | -0.12350 | 3.05 %   |
|    |        |        | 233B | 239B | -0.19403 | 7.53 %   |
| 36 | 283.03 | 0.0591 | 232A | 244A | 0.11032  | 2.43 %   |
|    |        |        | 233A | 244A | 0.15038  | 4.52 %   |
|    |        |        | 234A | 242A | 0.38656  | 29.89 %  |
|    |        |        | 235A | 244A | 0.19925  | 7.94 %   |
|    |        |        | 236A | 244A | 0.53767  | 57.82 %  |

|    |        |        |      |      |          |         |
|----|--------|--------|------|------|----------|---------|
|    |        |        | 230B | 237B | 0.19095  | 7.29 %  |
|    |        |        | 230B | 238B | 0.12008  | 2.88 %  |
|    |        |        | 230B | 239B | 0.17204  | 5.92 %  |
|    |        |        | 231B | 237B | 0.39833  | 31.73 % |
|    |        |        | 231B | 238B | 0.17706  | 6.27 %  |
|    |        |        | 232B | 237B | 0.26629  | 14.18 % |
|    |        |        | 232B | 238B | -0.11513 | 2.65 %  |
|    |        |        | 233B | 239B | -0.13154 | 3.46 %  |
| 37 | 280.77 | 0.0152 | 234A | 242A | 0.35073  | 24.60 % |
|    |        |        | 235A | 244A | -0.14557 | 4.24 %  |
|    |        |        | 236A | 243A | 0.15368  | 4.72 %  |
|    |        |        | 229B | 237B | 0.12163  | 2.96 %  |
|    |        |        | 230B | 237B | -0.21362 | 9.13 %  |
|    |        |        | 230B | 238B | -0.11220 | 2.52 %  |
|    |        |        | 230B | 239B | -0.13330 | 3.55 %  |
|    |        |        | 231B | 237B | -0.28720 | 16.50 % |
|    |        |        | 231B | 238B | -0.16956 | 5.75 %  |
|    |        |        | 232B | 237B | 0.55683  | 62.01 % |
|    |        |        | 232B | 238B | 0.15609  | 4.87 %  |
|    |        |        | 233B | 237B | -0.15167 | 4.60 %  |
|    |        |        | 233B | 238B | 0.44342  | 39.32 % |
| 40 | 275.84 | 0.0112 | 232A | 244A | 0.22798  | 10.39 % |
|    |        |        | 233A | 242A | -0.22024 | 9.70 %  |
|    |        |        | 233A | 243A | -0.12485 | 3.12 %  |
|    |        |        | 234A | 244A | 0.22118  | 9.78 %  |
|    |        |        | 235A | 244A | -0.21369 | 9.13 %  |
|    |        |        | 236A | 244A | 0.49291  | 48.59 % |
|    |        |        | 228B | 237B | 0.10676  | 2.28 %  |
|    |        |        | 229B | 237B | -0.12299 | 3.03 %  |
|    |        |        | 231B | 237B | -0.35624 | 25.38 % |
|    |        |        | 231B | 238B | 0.19585  | 7.67 %  |
|    |        |        | 232B | 237B | -0.15373 | 4.73 %  |
|    |        |        | 232B | 238B | 0.16842  | 5.67 %  |
|    |        |        | 233B | 239B | 0.41176  | 33.91 % |
| 41 | 274.67 | 0.0485 | 231A | 243A | 0.12639  | 3.19 %  |
|    |        |        | 232A | 243A | 0.16307  | 5.32 %  |
|    |        |        | 234A | 242A | -0.13871 | 3.85 %  |
|    |        |        | 234A | 243A | 0.68462  | 93.74 % |
|    |        |        | 235A | 243A | 0.12234  | 2.99 %  |
|    |        |        | 235A | 244A | -0.11463 | 2.63 %  |
|    |        |        | 236A | 243A | -0.18310 | 6.71 %  |
|    |        |        | 236A | 244A | 0.13985  | 3.91 %  |
|    |        |        | 230B | 237B | -0.19847 | 7.88 %  |
|    |        |        | 230B | 238B | -0.12053 | 2.91 %  |
|    |        |        | 230B | 239B | -0.15007 | 4.50 %  |
|    |        |        | 231B | 237B | 0.21679  | 9.40 %  |
|    |        |        | 231B | 238B | -0.34214 | 23.41 % |
|    |        |        | 233B | 239B | -0.17974 | 6.46 %  |
| 42 | 273.81 | 0.0124 | 231A | 242A | -0.19776 | 7.82 %  |
|    |        |        | 232A | 242A | -0.12819 | 3.29 %  |
|    |        |        | 233A | 242A | 0.17453  | 6.09 %  |
|    |        |        | 233A | 243A | 0.11842  | 2.80 %  |
|    |        |        | 233A | 244A | -0.13488 | 3.64 %  |
|    |        |        | 234A | 242A | -0.21921 | 9.61 %  |
|    |        |        | 234A | 243A | 0.19489  | 7.60 %  |
|    |        |        | 235A | 244A | -0.17639 | 6.22 %  |
|    |        |        | 230B | 237B | 0.30442  | 18.53 % |
|    |        |        | 230B | 238B | 0.20840  | 8.69 %  |
|    |        |        | 230B | 239B | 0.26134  | 13.66 % |
|    |        |        | 231B | 237B | -0.18656 | 6.96 %  |
|    |        |        | 231B | 238B | 0.15977  | 5.11 %  |
|    |        |        | 231B | 239B | 0.28202  | 15.91 % |
|    |        |        | 232B | 237B | 0.27426  | 15.04 % |
|    |        |        | 232B | 238B | 0.46756  | 43.72 % |
|    |        |        | 233B | 237B | -0.10922 | 2.39 %  |
|    |        |        | 233B | 239B | -0.13710 | 3.76 %  |
| 47 | 266.24 | 0.0120 | 231A | 242A | 0.13964  | 3.90 %  |

|    |        |        |      |      |          |          |
|----|--------|--------|------|------|----------|----------|
|    |        |        | 232A | 242A | -0.10849 | 2.35 %   |
|    |        |        | 232A | 244A | -0.10267 | 2.11 %   |
|    |        |        | 233A | 242A | -0.11363 | 2.58 %   |
|    |        |        | 234A | 244A | -0.22350 | 9.99 %   |
|    |        |        | 240A | 245A | -0.14132 | 3.99 %   |
|    |        |        | 241A | 245A | 0.14291  | 4.08 %   |
|    |        |        | 241A | 246A | 0.72574  | 105.34 % |
|    |        |        | 241A | 247A | 0.27334  | 14.94 %  |
|    |        |        | 229B | 237B | 0.11026  | 2.43 %   |
|    |        |        | 236B | 240B | -0.33158 | 21.99 %  |
| 49 | 264.32 | 0.0399 | 231A | 243A | -0.34989 | 24.48 %  |
|    |        |        | 232A | 242A | 0.52342  | 54.79 %  |
|    |        |        | 232A | 243A | -0.15225 | 4.64 %   |
|    |        |        | 233A | 243A | -0.17643 | 6.23 %   |
|    |        |        | 234A | 242A | -0.17785 | 6.33 %   |
|    |        |        | 235A | 242A | 0.12149  | 2.95 %   |
|    |        |        | 236A | 242A | -0.10245 | 2.10 %   |
|    |        |        | 240A | 245A | -0.16218 | 5.26 %   |
|    |        |        | 241A | 247A | 0.26006  | 13.53 %  |
|    |        |        | 222B | 238B | 0.10056  | 2.02 %   |
|    |        |        | 231B | 238B | -0.22161 | 9.82 %   |
|    |        |        | 231B | 239B | 0.13777  | 3.80 %   |
|    |        |        | 232B | 238B | 0.13861  | 3.84 %   |
|    |        |        | 232B | 239B | 0.16724  | 5.59 %   |
|    |        |        | 233B | 239B | -0.16256 | 5.29 %   |
|    |        |        | 236B | 240B | 0.18333  | 6.72 %   |
| 51 | 263.08 | 0.0296 | 231A | 243A | -0.22718 | 10.32 %  |
|    |        |        | 232A | 243A | 0.21698  | 9.42 %   |
|    |        |        | 233A | 242A | -0.11789 | 2.78 %   |
|    |        |        | 233A | 243A | -0.17534 | 6.15 %   |
|    |        |        | 233A | 244A | -0.11361 | 2.58 %   |
|    |        |        | 234A | 244A | -0.18411 | 6.78 %   |
|    |        |        | 235A | 243A | 0.15265  | 4.66 %   |
|    |        |        | 241A | 246A | -0.20867 | 8.71 %   |
|    |        |        | 241A | 247A | 0.23746  | 11.28 %  |
|    |        |        | 228B | 237B | -0.28411 | 16.14 %  |
|    |        |        | 228B | 238B | 0.51209  | 52.45 %  |
|    |        |        | 229B | 237B | -0.13548 | 3.67 %   |
|    |        |        | 231B | 238B | 0.21583  | 9.32 %   |
|    |        |        | 236B | 240B | 0.16979  | 5.77 %   |
| 52 | 261.65 | 0.0122 | 231A | 243A | 0.69794  | 97.42 %  |
|    |        |        | 232A | 243A | 0.15841  | 5.02 %   |
|    |        |        | 233A | 243A | -0.29531 | 17.44 %  |
|    |        |        | 234A | 243A | -0.17675 | 6.25 %   |
|    |        |        | 235A | 243A | 0.14404  | 4.15 %   |
|    |        |        | 240A | 245A | -0.17131 | 5.87 %   |
|    |        |        | 241A | 247A | 0.34500  | 23.81 %  |
|    |        |        | 228B | 238B | -0.12127 | 2.94 %   |
|    |        |        | 231B | 239B | 0.17964  | 6.45 %   |
|    |        |        | 232B | 238B | -0.10275 | 2.11 %   |
| 53 | 261.23 | 0.0104 | 231A | 243A | -0.20682 | 8.55 %   |
|    |        |        | 233A | 242A | -0.25911 | 13.43 %  |
|    |        |        | 233A | 243A | 0.41049  | 33.70 %  |
|    |        |        | 235A | 242A | 0.11547  | 2.67 %   |
|    |        |        | 235A | 243A | -0.17760 | 6.31 %   |
|    |        |        | 240A | 245A | -0.18685 | 6.98 %   |
|    |        |        | 240A | 246A | -0.24722 | 12.22 %  |
|    |        |        | 240A | 247A | 0.12682  | 3.22 %   |
|    |        |        | 241A | 246A | -0.31477 | 19.82 %  |
|    |        |        | 241A | 247A | 0.36819  | 27.11 %  |
|    |        |        | 241A | 248A | -0.10844 | 2.35 %   |
|    |        |        | 241A | 249A | -0.12686 | 3.22 %   |
|    |        |        | 228B | 237B | 0.12964  | 3.36 %   |
|    |        |        | 228B | 238B | -0.18891 | 7.14 %   |
|    |        |        | 231B | 239B | 0.11338  | 2.57 %   |
|    |        |        | 232B | 238B | -0.12862 | 3.31 %   |
|    |        |        | 236B | 240B | -0.21852 | 9.55 %   |

|    |        |        |      |      |          |         |
|----|--------|--------|------|------|----------|---------|
|    |        |        | 236B | 245B | -0.12605 | 3.18 %  |
| 54 | 260.87 | 0.0687 | 231A | 242A | 0.14470  | 4.19 %  |
|    |        |        | 232A | 242A | -0.19044 | 7.25 %  |
|    |        |        | 233A | 242A | -0.18593 | 6.91 %  |
|    |        |        | 233A | 243A | 0.13971  | 3.90 %  |
|    |        |        | 233A | 244A | -0.16483 | 5.43 %  |
|    |        |        | 234A | 244A | -0.40317 | 32.51 % |
|    |        |        | 236A | 242A | 0.11602  | 2.69 %  |
|    |        |        | 236A | 244A | 0.10601  | 2.25 %  |
|    |        |        | 240A | 246A | 0.11962  | 2.86 %  |
|    |        |        | 228B | 237B | 0.16398  | 5.38 %  |
|    |        |        | 228B | 238B | -0.27942 | 15.62 % |
|    |        |        | 231B | 239B | 0.18173  | 6.61 %  |
|    |        |        | 232B | 239B | 0.12969  | 3.36 %  |
|    |        |        | 233B | 239B | 0.18539  | 6.87 %  |
|    |        |        | 236B | 240B | 0.44749  | 40.05 % |
|    |        |        | 236B | 244B | 0.19106  | 7.30 %  |
|    |        |        | 236B | 245B | 0.20526  | 8.43 %  |
|    |        |        | 236B | 246B | 0.10767  | 2.32 %  |
| 55 | 260.19 | 0.0165 | 231A | 243A | 0.14351  | 4.12 %  |
|    |        |        | 231A | 244A | 0.13296  | 3.54 %  |
|    |        |        | 232A | 242A | 0.52340  | 54.79 % |
|    |        |        | 232A | 243A | 0.29445  | 17.34 % |
|    |        |        | 233A | 242A | -0.12111 | 2.93 %  |
|    |        |        | 233A | 243A | 0.43015  | 37.01 % |
|    |        |        | 234A | 242A | -0.12522 | 3.14 %  |
|    |        |        | 234A | 243A | -0.12898 | 3.33 %  |
|    |        |        | 235A | 242A | 0.11391  | 2.60 %  |
|    |        |        | 235A | 243A | -0.12806 | 3.28 %  |
|    |        |        | 236A | 242A | -0.11342 | 2.57 %  |
|    |        |        | 236A | 243A | -0.15947 | 5.09 %  |
|    |        |        | 241A | 246A | 0.13233  | 3.50 %  |
|    |        |        | 241A | 247A | -0.23439 | 10.99 % |
|    |        |        | 232B | 239B | -0.16055 | 5.16 %  |
|    |        |        | 236B | 240B | 0.10467  | 2.19 %  |
| 56 | 259.33 | 0.0834 | 231A | 242A | 0.22333  | 9.98 %  |
|    |        |        | 232A | 242A | 0.16314  | 5.32 %  |
|    |        |        | 232A | 243A | 0.24879  | 12.38 % |
|    |        |        | 233A | 242A | 0.34434  | 23.71 % |
|    |        |        | 234A | 244A | -0.33307 | 22.19 % |
|    |        |        | 235A | 242A | -0.14363 | 4.13 %  |
|    |        |        | 236A | 242A | -0.10596 | 2.25 %  |
|    |        |        | 239A | 245A | 0.22785  | 10.38 % |
|    |        |        | 239A | 246A | 0.17996  | 6.48 %  |
|    |        |        | 239A | 247A | -0.12073 | 2.92 %  |
|    |        |        | 240A | 245A | -0.14894 | 4.44 %  |
|    |        |        | 240A | 246A | -0.19019 | 7.23 %  |
|    |        |        | 241A | 248A | -0.15181 | 4.61 %  |
|    |        |        | 228B | 238B | -0.13394 | 3.59 %  |
|    |        |        | 229B | 237B | 0.11819  | 2.79 %  |
|    |        |        | 231B | 239B | -0.21524 | 9.27 %  |
|    |        |        | 232B | 239B | -0.14161 | 4.01 %  |
|    |        |        | 233B | 239B | 0.23667  | 11.20 % |
|    |        |        | 236B | 241B | -0.10811 | 2.34 %  |
| 57 | 258.43 | 0.0356 | 231A | 243A | 0.14767  | 4.36 %  |
|    |        |        | 232A | 243A | -0.20716 | 8.58 %  |
|    |        |        | 233A | 243A | 0.16057  | 5.16 %  |
|    |        |        | 233A | 244A | 0.19116  | 7.31 %  |
|    |        |        | 235A | 244A | -0.20821 | 8.67 %  |
|    |        |        | 239A | 245A | 0.24276  | 11.79 % |
|    |        |        | 239A | 246A | 0.25650  | 13.16 % |
|    |        |        | 239A | 247A | -0.16002 | 5.12 %  |
|    |        |        | 240A | 245A | -0.23735 | 11.27 % |
|    |        |        | 240A | 246A | -0.20313 | 8.25 %  |
|    |        |        | 241A | 248A | -0.16039 | 5.14 %  |
|    |        |        | 228B | 238B | 0.20483  | 8.39 %  |
|    |        |        | 232B | 238B | 0.11986  | 2.87 %  |

|    |        |        |      |      |          |         |
|----|--------|--------|------|------|----------|---------|
|    |        |        | 232B | 239B | 0.29689  | 17.63 % |
|    |        |        | 233B | 239B | 0.10362  | 2.15 %  |
|    |        |        | 236B | 242B | -0.14121 | 3.99 %  |
|    |        |        | 236B | 243B | 0.14592  | 4.26 %  |
|    |        |        | 236B | 244B | 0.13656  | 3.73 %  |
|    |        |        | 236B | 245B | 0.15996  | 5.12 %  |
|    |        |        | 236B | 246B | 0.13715  | 3.76 %  |
| 59 | 257.08 | 0.0674 | 231A | 243A | -0.31634 | 20.01 % |
|    |        |        | 232A | 242A | -0.19956 | 7.96 %  |
|    |        |        | 232A | 243A | 0.14304  | 4.09 %  |
|    |        |        | 233A | 243A | -0.19842 | 7.87 %  |
|    |        |        | 234A | 244A | 0.16619  | 5.52 %  |
|    |        |        | 235A | 243A | 0.12068  | 2.91 %  |
|    |        |        | 239A | 245A | 0.20343  | 8.28 %  |
|    |        |        | 239A | 246A | 0.37463  | 28.07 % |
|    |        |        | 239A | 247A | -0.10832 | 2.35 %  |
|    |        |        | 240A | 245A | -0.19746 | 7.80 %  |
|    |        |        | 240A | 246A | -0.11367 | 2.58 %  |
|    |        |        | 240A | 248A | -0.10508 | 2.21 %  |
|    |        |        | 241A | 246A | 0.13510  | 3.65 %  |
|    |        |        | 241A | 247A | -0.24115 | 11.63 % |
|    |        |        | 228B | 237B | 0.15196  | 4.62 %  |
|    |        |        | 228B | 238B | -0.12268 | 3.01 %  |
|    |        |        | 231B | 239B | 0.15364  | 4.72 %  |
|    |        |        | 232B | 238B | -0.15661 | 4.91 %  |
|    |        |        | 232B | 239B | -0.32991 | 21.77 % |
|    |        |        | 233B | 239B | -0.15595 | 4.86 %  |
| 60 | 256.49 | 0.0225 | 232A | 243A | 0.12769  | 3.26 %  |
|    |        |        | 233A | 242A | 0.16585  | 5.50 %  |
|    |        |        | 239A | 245A | 0.23875  | 11.40 % |
|    |        |        | 239A | 246A | -0.28963 | 16.78 % |
|    |        |        | 240A | 245A | -0.43558 | 37.95 % |
|    |        |        | 240A | 246A | 0.30349  | 18.42 % |
|    |        |        | 241A | 246A | -0.10275 | 2.11 %  |
|    |        |        | 241A | 247A | -0.20162 | 8.13 %  |
|    |        |        | 241A | 248A | 0.49922  | 49.84 % |
|    |        |        | 241A | 249A | -0.14659 | 4.30 %  |
|    |        |        | 236B | 241B | 0.11995  | 2.88 %  |

**Table S8:** Selection of excitation wavelengths, oscillator strengths and orbital contributions calculated via time-dependent density functional theory for compound **5**: B3LYP-GD3/(Co/La: def2TZVPP; N/O/F/S: def2TZVP; C/H: def2SVPP basis sets), NStates = 60. Only excited states with oscillator strengths > 0.01 are shown.

| Excited state | Peak information |                     | Orbital contributions |       |             |            |
|---------------|------------------|---------------------|-----------------------|-------|-------------|------------|
|               | $\lambda$ / nm   | Oscillator strength | initial               | final | coefficient | percentage |
| 15            | 375.54           | 0.0111              | 238A                  | 242A  | -0.14305    | 4.09 %     |
|               |                  |                     | 239A                  | 242A  | 0.20265     | 8.21 %     |
|               |                  |                     | 240A                  | 242A  | 0.18401     | 6.77 %     |
|               |                  |                     | 240A                  | 243A  | 0.11780     | 2.78 %     |
|               |                  |                     | 241A                  | 242A  | -0.45921    | 42.17 %    |
|               |                  |                     | 241A                  | 243A  | -0.27259    | 14.86 %    |
|               |                  |                     | 235B                  | 242B  | 0.14428     | 4.16 %     |
|               |                  |                     | 236B                  | 239B  | -0.11552    | 2.67 %     |
|               |                  |                     | 237B                  | 239B  | 0.62881     | 79.08 %    |
|               |                  |                     | 237B                  | 240B  | -0.14782    | 4.37 %     |
|               |                  |                     | 238B                  | 240B  | -0.10025    | 2.01 %     |
|               |                  |                     | 238B                  | 241B  | -0.10377    | 2.15 %     |
| 17            | 366.24           | 0.0102              | 236A                  | 244A  | 0.10684     | 2.28 %     |
|               |                  |                     | 237A                  | 242A  | 0.16002     | 5.12 %     |
|               |                  |                     | 238A                  | 242A  | -0.24683    | 12.19 %    |
|               |                  |                     | 239A                  | 242A  | 0.50182     | 50.36 %    |
|               |                  |                     | 241A                  | 243A  | 0.27137     | 14.73 %    |
|               |                  |                     | 235B                  | 240B  | -0.11153    | 2.49 %     |

|    |        |        |      |      |          |         |
|----|--------|--------|------|------|----------|---------|
|    |        |        | 236B | 239B | -0.19457 | 7.57 %  |
|    |        |        | 237B | 240B | 0.58636  | 68.76 % |
|    |        |        | 238B | 240B | -0.18341 | 6.73 %  |
| 19 | 359.49 | 0.0219 | 234A | 242A | -0.10689 | 2.29 %  |
|    |        |        | 237A | 242A | 0.11804  | 2.79 %  |
|    |        |        | 237A | 243A | 0.10661  | 2.27 %  |
|    |        |        | 238A | 243A | -0.18844 | 7.10 %  |
|    |        |        | 239A | 242A | 0.13833  | 3.83 %  |
|    |        |        | 239A | 243A | 0.37467  | 28.08 % |
|    |        |        | 239A | 244A | -0.16474 | 5.43 %  |
|    |        |        | 240A | 242A | 0.40606  | 32.98 % |
|    |        |        | 240A | 243A | 0.21885  | 9.58 %  |
|    |        |        | 241A | 242A | 0.18408  | 6.78 %  |
|    |        |        | 241A | 244A | 0.10976  | 2.41 %  |
|    |        |        | 236B | 239B | 0.10976  | 2.41 %  |
|    |        |        | 236B | 242B | -0.10641 | 2.26 %  |
|    |        |        | 237B | 241B | -0.19285 | 7.44 %  |
| 21 | 352.21 | 0.0450 | 237A | 243A | 0.23523  | 11.07 % |
|    |        |        | 237A | 244A | 0.14527  | 4.22 %  |
|    |        |        | 238A | 244A | 0.11076  | 2.45 %  |
|    |        |        | 239A | 242A | -0.21625 | 9.35 %  |
|    |        |        | 239A | 243A | 0.52288  | 54.68 % |
|    |        |        | 239A | 244A | 0.17431  | 6.08 %  |
|    |        |        | 240A | 242A | -0.30242 | 18.29 % |
|    |        |        | 240A | 243A | 0.20380  | 8.31 %  |
|    |        |        | 240A | 244A | 0.10095  | 2.04 %  |
|    |        |        | 236B | 241B | -0.10528 | 2.22 %  |
|    |        |        | 237B | 241B | 0.19461  | 7.57 %  |
|    |        |        | 238B | 241B | -0.51937 | 53.95 % |
| 22 | 349.40 | 0.0136 | 236A | 243A | -0.11426 | 2.61 %  |
|    |        |        | 237A | 242A | -0.17097 | 5.85 %  |
|    |        |        | 237A | 243A | 0.10887  | 2.37 %  |
|    |        |        | 237A | 244A | 0.10465  | 2.19 %  |
|    |        |        | 238A | 242A | -0.34056 | 23.20 % |
|    |        |        | 238A | 243A | 0.35109  | 24.65 % |
|    |        |        | 238A | 244A | -0.14657 | 4.30 %  |
|    |        |        | 239A | 242A | -0.12083 | 2.92 %  |
|    |        |        | 239A | 243A | -0.15752 | 4.96 %  |
|    |        |        | 240A | 242A | -0.25081 | 12.58 % |
|    |        |        | 240A | 243A | 0.44664  | 39.90 % |
|    |        |        | 241A | 243A | -0.12853 | 3.30 %  |
|    |        |        | 241A | 244A | 0.19406  | 7.53 %  |
|    |        |        | 236B | 240B | 0.26755  | 14.32 % |
|    |        |        | 236B | 241B | 0.11171  | 2.50 %  |
|    |        |        | 237B | 240B | 0.12209  | 2.98 %  |
|    |        |        | 237B | 241B | -0.20529 | 8.43 %  |
|    |        |        | 238B | 241B | 0.27984  | 15.66 % |
| 24 | 346.25 | 0.0734 | 238A | 242A | -0.13902 | 3.87 %  |
|    |        |        | 239A | 244A | 0.11279  | 2.54 %  |
|    |        |        | 240A | 242A | 0.13157  | 3.46 %  |
|    |        |        | 241A | 244A | 0.56471  | 63.78 % |
|    |        |        | 235B | 239B | -0.11116 | 2.47 %  |
|    |        |        | 235B | 240B | -0.11839 | 2.80 %  |
|    |        |        | 236B | 239B | 0.18048  | 6.51 %  |
|    |        |        | 236B | 240B | -0.41653 | 34.70 % |
|    |        |        | 236B | 241B | -0.10376 | 2.15 %  |
|    |        |        | 237B | 241B | 0.44878  | 40.28 % |
|    |        |        | 238B | 241B | 0.24519  | 12.02 % |
|    |        |        | 238B | 242B | 0.22274  | 9.92 %  |
| 27 | 337.78 | 0.0302 | 238A | 242A | -0.15309 | 4.69 %  |
|    |        |        | 238A | 244A | -0.10098 | 2.04 %  |
|    |        |        | 239A | 244A | -0.20792 | 8.65 %  |
|    |        |        | 240A | 243A | -0.12268 | 3.01 %  |
|    |        |        | 231B | 239B | -0.10114 | 2.05 %  |
|    |        |        | 235B | 239B | -0.37726 | 28.47 % |
|    |        |        | 235B | 240B | -0.20357 | 8.29 %  |
|    |        |        | 236B | 239B | -0.10727 | 2.30 %  |

|    |        |        |      |      |          |         |
|----|--------|--------|------|------|----------|---------|
|    |        |        | 236B | 241B | 0.12353  | 3.05 %  |
|    |        |        | 237B | 239B | 0.13503  | 3.65 %  |
|    |        |        | 237B | 241B | -0.23281 | 10.84 % |
|    |        |        | 237B | 242B | -0.15075 | 4.55 %  |
|    |        |        | 238B | 241B | -0.18497 | 6.84 %  |
|    |        |        | 238B | 242B | 0.65058  | 84.65 % |
| 30 | 327.52 | 0.0109 | 237A | 243A | 0.10400  | 2.16 %  |
|    |        |        | 238A | 244A | 0.12352  | 3.05 %  |
|    |        |        | 239A | 244A | -0.23231 | 10.79 % |
|    |        |        | 239A | 247A | 0.11805  | 2.79 %  |
|    |        |        | 240A | 244A | 0.26120  | 13.65 % |
|    |        |        | 241A | 249A | 0.12686  | 3.22 %  |
|    |        |        | 231B | 240B | 0.12991  | 3.38 %  |
|    |        |        | 233B | 239B | -0.11754 | 2.76 %  |
|    |        |        | 234B | 239B | -0.15676 | 4.91 %  |
|    |        |        | 235B | 240B | 0.52763  | 55.68 % |
|    |        |        | 235B | 248B | -0.10674 | 2.28 %  |
|    |        |        | 236B | 241B | -0.10982 | 2.41 %  |
|    |        |        | 237B | 242B | 0.37134  | 27.58 % |
|    |        |        | 237B | 243B | -0.11924 | 2.84 %  |
|    |        |        | 238B | 242B | 0.32791  | 21.50 % |
| 36 | 313.18 | 0.0116 | 235A | 242A | -0.17681 | 6.25 %  |
|    |        |        | 237A | 243A | 0.11030  | 2.43 %  |
|    |        |        | 239A | 246A | 0.11111  | 2.47 %  |
|    |        |        | 239A | 247A | 0.16306  | 5.32 %  |
|    |        |        | 239A | 249A | 0.13295  | 3.54 %  |
|    |        |        | 240A | 248A | -0.17246 | 5.95 %  |
|    |        |        | 241A | 246A | 0.10977  | 2.41 %  |
|    |        |        | 241A | 247A | 0.16705  | 5.58 %  |
|    |        |        | 241A | 249A | 0.13222  | 3.50 %  |
|    |        |        | 232B | 239B | -0.20795 | 8.65 %  |
|    |        |        | 232B | 240B | 0.13200  | 3.48 %  |
|    |        |        | 233B | 239B | 0.10319  | 2.13 %  |
|    |        |        | 233B | 240B | -0.23791 | 11.32 % |
|    |        |        | 234B | 239B | 0.38791  | 30.09 % |
|    |        |        | 234B | 240B | -0.30508 | 18.61 % |
|    |        |        | 234B | 242B | 0.10557  | 2.23 %  |
|    |        |        | 234B | 243B | 0.15556  | 4.84 %  |
|    |        |        | 235B | 240B | -0.16791 | 5.64 %  |
|    |        |        | 235B | 243B | 0.12773  | 3.26 %  |
|    |        |        | 236B | 247B | 0.12462  | 3.11 %  |
|    |        |        | 236B | 248B | -0.15865 | 5.03 %  |
|    |        |        | 236B | 249B | -0.10080 | 2.03 %  |
|    |        |        | 238B | 238B | 0.13273  | 3.52 %  |
|    |        |        | 238B | 246B | -0.13057 | 3.41 %  |
|    |        |        | 238B | 247B | -0.10166 | 2.07 %  |
|    |        |        | 238B | 248B | -0.21746 | 9.46 %  |
| 38 | 310.51 | 0.0140 | 240A | 244A | 0.12109  | 2.93 %  |
|    |        |        | 240A | 247A | -0.10279 | 2.11 %  |
|    |        |        | 240A | 248A | -0.18694 | 6.99 %  |
|    |        |        | 231B | 240B | -0.13693 | 3.75 %  |
|    |        |        | 232B | 240B | -0.10177 | 2.07 %  |
|    |        |        | 233B | 240B | 0.27160  | 14.75 % |
|    |        |        | 234B | 240B | 0.50703  | 51.42 % |
|    |        |        | 234B | 243B | -0.12175 | 2.96 %  |
|    |        |        | 235B | 239B | 0.15374  | 4.73 %  |
|    |        |        | 235B | 242B | 0.20251  | 8.20 %  |
|    |        |        | 236B | 241B | -0.23931 | 11.45 % |
|    |        |        | 236B | 242B | -0.22187 | 9.85 %  |
|    |        |        | 236B | 247B | 0.16416  | 5.39 %  |
|    |        |        | 237B | 242B | -0.29519 | 17.43 % |
|    |        |        | 237B | 249B | -0.13274 | 3.52 %  |
|    |        |        | 238B | 247B | -0.13327 | 3.55 %  |
| 43 | 294.82 | 0.0108 | 236A | 243A | -0.11571 | 2.68 %  |
|    |        |        | 231B | 239B | 0.21329  | 9.10 %  |
|    |        |        | 231B | 242B | -0.25113 | 12.61 % |
|    |        |        | 232B | 239B | -0.13129 | 3.45 %  |



|    |        |        |      |      |          |          |
|----|--------|--------|------|------|----------|----------|
|    |        |        | 233B | 240B | 0.12375  | 3.06 %   |
|    |        |        | 233B | 242B | 0.12906  | 3.33 %   |
|    |        |        | 234B | 239B | 0.26951  | 14.53 %  |
|    |        |        | 234B | 240B | 0.14956  | 4.47 %   |
|    |        |        | 234B | 242B | 0.30984  | 19.20 %  |
|    |        |        | 235B | 239B | -0.29101 | 16.94 %  |
|    |        |        | 235B | 242B | -0.33592 | 22.57 %  |
|    |        |        | 236B | 242B | -0.38028 | 28.92 %  |
|    |        |        | 237B | 242B | 0.39410  | 31.06 %  |
|    |        |        | 238B | 243B | -0.15650 | 4.90 %   |
| 47 | 288.62 | 0.0120 | 234A | 244A | -0.17852 | 6.37 %   |
|    |        |        | 235A | 244A | -0.10016 | 2.01 %   |
|    |        |        | 236A | 244A | -0.20295 | 8.24 %   |
|    |        |        | 237A | 242A | 0.24439  | 11.95 %  |
|    |        |        | 237A | 243A | -0.31512 | 19.86 %  |
|    |        |        | 237A | 244A | 0.60173  | 72.42 %  |
|    |        |        | 238A | 244A | -0.19418 | 7.54 %   |
|    |        |        | 231B | 240B | -0.15697 | 4.93 %   |
|    |        |        | 233B | 240B | -0.10880 | 2.37 %   |
|    |        |        | 233B | 241B | 0.11035  | 2.44 %   |
|    |        |        | 234B | 241B | 0.20640  | 8.52 %   |
|    |        |        | 235B | 241B | -0.14884 | 4.43 %   |
|    |        |        | 237B | 243B | 0.13532  | 3.66 %   |
|    |        |        | 238B | 243B | 0.32155  | 20.68 %  |
| 48 | 284.66 | 0.1407 | 234A | 243A | 0.15540  | 4.83 %   |
|    |        |        | 235A | 242A | -0.28169 | 15.87 %  |
|    |        |        | 235A | 243A | -0.11526 | 2.66 %   |
|    |        |        | 236A | 242A | 0.50155  | 50.31 %  |
|    |        |        | 236A | 243A | -0.17270 | 5.97 %   |
|    |        |        | 237A | 242A | 0.10883  | 2.37 %   |
|    |        |        | 231B | 240B | 0.18524  | 6.86 %   |
|    |        |        | 232B | 239B | 0.45320  | 41.08 %  |
|    |        |        | 232B | 240B | 0.25360  | 12.86 %  |
|    |        |        | 232B | 242B | -0.16200 | 5.25 %   |
|    |        |        | 233B | 239B | 0.20760  | 8.62 %   |
|    |        |        | 233B | 240B | -0.25274 | 12.78 %  |
|    |        |        | 234B | 240B | 0.16524  | 5.46 %   |
|    |        |        | 238B | 243B | 0.12744  | 3.25 %   |
|    |        |        | 238B | 244B | 0.11388  | 2.59 %   |
| 49 | 283.79 | 0.0233 | 234A | 244A | -0.11053 | 2.44 %   |
|    |        |        | 235A | 242A | -0.24370 | 11.88 %  |
|    |        |        | 236A | 242A | -0.15502 | 4.81 %   |
|    |        |        | 236A | 243A | 0.20986  | 8.81 %   |
|    |        |        | 237A | 244A | 0.27982  | 15.66 %  |
|    |        |        | 230B | 240B | -0.10726 | 2.30 %   |
|    |        |        | 231B | 239B | 0.41214  | 33.97 %  |
|    |        |        | 231B | 241B | 0.10221  | 2.09 %   |
|    |        |        | 232B | 239B | 0.24561  | 12.06 %  |
|    |        |        | 232B | 240B | 0.23407  | 10.96 %  |
|    |        |        | 232B | 242B | -0.11922 | 2.84 %   |
|    |        |        | 233B | 240B | 0.44350  | 39.34 %  |
|    |        |        | 235B | 242B | 0.14116  | 3.99 %   |
|    |        |        | 238B | 243B | -0.25620 | 13.13 %  |
|    |        |        | 238B | 244B | -0.15664 | 4.91 %   |
|    |        |        | 238B | 245B | -0.15483 | 4.79 %   |
| 50 | 281.86 | 0.0264 | 235A | 242A | 0.24850  | 12.35 %  |
|    |        |        | 236A | 242A | 0.21568  | 9.30 %   |
|    |        |        | 236A | 243A | -0.17563 | 6.17 %   |
|    |        |        | 237A | 244A | -0.11243 | 2.53 %   |
|    |        |        | 231B | 239B | 0.74226  | 110.19 % |
|    |        |        | 232B | 239B | -0.19808 | 7.85 %   |
|    |        |        | 233B | 240B | -0.16841 | 5.67 %   |
|    |        |        | 234B | 242B | -0.12050 | 2.90 %   |
|    |        |        | 235B | 239B | -0.12652 | 3.20 %   |
|    |        |        | 235B | 242B | 0.28511  | 16.26 %  |
|    |        |        | 236B | 242B | 0.11363  | 2.58 %   |
| 51 | 280.39 | 0.0243 | 235A | 242A | 0.31957  | 20.42 %  |

|    |        |        |      |      |          |          |
|----|--------|--------|------|------|----------|----------|
|    |        |        | 236A | 242A | -0.13027 | 3.39 %   |
|    |        |        | 230B | 240B | -0.17344 | 6.02 %   |
|    |        |        | 231B | 239B | -0.10833 | 2.35 %   |
|    |        |        | 232B | 239B | -0.17078 | 5.83 %   |
|    |        |        | 232B | 240B | 0.81542  | 132.98 % |
|    |        |        | 234B | 240B | 0.13448  | 3.62 %   |
|    |        |        | 238B | 245B | 0.10885  | 2.37 %   |
| 52 | 278.47 | 0.0322 | 234A | 242A | -0.45539 | 41.48 %  |
|    |        |        | 234A | 243A | -0.10813 | 2.34 %   |
|    |        |        | 234A | 244A | -0.12655 | 3.20 %   |
|    |        |        | 235A | 242A | -0.10843 | 2.35 %   |
|    |        |        | 235A | 243A | 0.28938  | 16.75 %  |
|    |        |        | 236A | 242A | 0.57823  | 66.87 %  |
|    |        |        | 236A | 243A | 0.11197  | 2.51 %   |
|    |        |        | 236A | 244A | 0.27207  | 14.80 %  |
|    |        |        | 237A | 244A | 0.13843  | 3.83 %   |
|    |        |        | 231B | 239B | -0.12739 | 3.25 %   |
|    |        |        | 231B | 241B | 0.12300  | 3.03 %   |
|    |        |        | 232B | 239B | -0.19805 | 7.84 %   |
|    |        |        | 232B | 240B | 0.11069  | 2.45 %   |
|    |        |        | 233B | 240B | 0.21774  | 9.48 %   |
| 53 | 277.13 | 0.0624 | 234A | 242A | -0.26905 | 14.48 %  |
|    |        |        | 234A | 243A | -0.11879 | 2.82 %   |
|    |        |        | 235A | 242A | -0.31749 | 20.16 %  |
|    |        |        | 235A | 243A | -0.13790 | 3.80 %   |
|    |        |        | 236A | 242A | -0.27087 | 14.67 %  |
|    |        |        | 236A | 243A | -0.38794 | 30.10 %  |
|    |        |        | 237A | 242A | -0.16129 | 5.20 %   |
|    |        |        | 237A | 243A | -0.16285 | 5.30 %   |
|    |        |        | 230B | 240B | -0.16292 | 5.31 %   |
|    |        |        | 231B | 240B | 0.51147  | 52.32 %  |
|    |        |        | 232B | 239B | -0.14611 | 4.27 %   |
|    |        |        | 233B | 241B | 0.19046  | 7.26 %   |
|    |        |        | 235B | 240B | -0.11357 | 2.58 %   |
|    |        |        | 236B | 243B | 0.12162  | 2.96 %   |
|    |        |        | 238B | 244B | 0.12580  | 3.17 %   |
|    |        |        | 238B | 245B | 0.10215  | 2.09 %   |
| 54 | 276.11 | 0.0189 | 234A | 242A | 0.20794  | 8.65 %   |
|    |        |        | 234A | 243A | 0.42607  | 36.31 %  |
|    |        |        | 235A | 242A | 0.19922  | 7.94 %   |
|    |        |        | 235A | 243A | 0.56030  | 62.79 %  |
|    |        |        | 236A | 243A | 0.16764  | 5.62 %   |
|    |        |        | 237A | 243A | 0.21351  | 9.12 %   |
|    |        |        | 237A | 244A | 0.11977  | 2.87 %   |
|    |        |        | 231B | 240B | 0.41021  | 33.65 %  |
|    |        |        | 233B | 241B | 0.19548  | 7.64 %   |
| 57 | 271.47 | 0.0108 | 234A | 242A | -0.18683 | 6.98 %   |
|    |        |        | 234A | 243A | 0.40814  | 33.32 %  |
|    |        |        | 234A | 244A | 0.15422  | 4.76 %   |
|    |        |        | 235A | 242A | -0.14957 | 4.47 %   |
|    |        |        | 235A | 243A | 0.12145  | 2.95 %   |
|    |        |        | 235A | 244A | 0.34564  | 23.89 %  |
|    |        |        | 236A | 242A | -0.20976 | 8.80 %   |
|    |        |        | 236A | 243A | -0.23795 | 11.32 %  |
|    |        |        | 236A | 244A | 0.41029  | 33.67 %  |
|    |        |        | 237A | 242A | -0.13067 | 3.41 %   |
|    |        |        | 237A | 244A | 0.18835  | 7.10 %   |
|    |        |        | 231B | 240B | -0.16447 | 5.41 %   |
|    |        |        | 231B | 241B | -0.15057 | 4.53 %   |
|    |        |        | 233B | 240B | -0.14392 | 4.14 %   |
|    |        |        | 233B | 241B | -0.23062 | 10.64 %  |
|    |        |        | 238B | 244B | -0.20087 | 8.07 %   |
|    |        |        | 238B | 245B | -0.16125 | 5.20 %   |
| 60 | 267.65 | 0.0125 | 234A | 244A | -0.10105 | 2.04 %   |
|    |        |        | 235A | 244A | -0.11345 | 2.57 %   |
|    |        |        | 232B | 240B | -0.15880 | 5.04 %   |
|    |        |        | 232B | 241B | 0.11702  | 2.74 %   |

|      |      |          |         |
|------|------|----------|---------|
| 233B | 243B | 0.11128  | 2.48 %  |
| 234B | 243B | 0.12291  | 3.02 %  |
| 235B | 243B | -0.19466 | 7.58 %  |
| 236B | 243B | 0.66467  | 88.36 % |
| 236B | 244B | 0.10086  | 2.03 %  |
| 237B | 243B | 0.46519  | 43.28 % |
| 238B | 243B | -0.17279 | 5.97 %  |

---

## References

1. D. F. Evans, *J. Chem. Soc.*, 1959, 2003-2005.
2. A. A. Pavlov, G. L. Denisov, M. A. Kiskin, Y. V. Nelyubina and V. V. Novikov, *Inorg. Chem.*, 2017, **56**, 14759-14762.
3. G. A. Bain and J. F. Berry, *J. Chem. Educ.*, 2008, **85**, 532-536.
4. M. J. Frisch, G. W. Trucks, H. B. Schlegel, G. E. Scuseria, M. A. Robb, J. R. Cheeseman, G. Scalmani, V. Barone, B. Mennucci, G. A. Petersson, H. Nakatsuji, M. Caricato, X. Li, H. P. Hratchian, A. F. Izmaylov, J. Bloino, G. Zheng, J. L. Sonnenburg, M. Hada, M. Ehara, K. Toyota, R. Fukuda, J. Hasegawa, M. Ishida, T. Nakajima, Y. Honda, O. Kitao, H. Nakai, T. Vreven, J. A. Montgomery Jr., J. E. Peralta, F. Ogliaro, M. Bearpark, J. J. Heyd, E. Brothers, K. N. Kudin, V. N. Staroverov, T. Keith, R. Kobayashi, J. Normand, K. Raghavachari, A. Rendell, J. C. Burant, S. S. Iyengar, J. Tomasi, M. Cossi, N. Rega, J. M. Millam, M. Klene, J. E. Knox, J. B. Cross, V. Bakken, C. Adamo, J. Jaramillo, R. Gomperts, R. E. Stratmann, O. Yazyey, A. J. Austin, R. Cammi, C. Pomelli, J. W. Ochterski, R. L. Martin, K. Morokuma, V. G. Zakrzewski, G. A. Voth, P. Salvador, J. J. Dannenberg, S. Dapprich, A. D. Daniels, O. Farkas, J. B. Foresman, J. V. Ortiz, J. Cioslowski and D. L. Fox, *Gaussian 09, Revision B.01*, Wallingford CT, 2010.
5. F. Weigend, *Phys. Chem. Chem. Phys.*, 2006, **8**, 1057-1065.
6. F. Weigend and R. Ahlrichs, *Phys. Chem. Chem. Phys.*, 2005, **7**, 3297-3305.
7. S. Grimme, S. Ehrlich and L. Goerigk, *J. Comput. Chem.*, 2011, **32**, 1456-1465.
8. E. D. Glendening, C. R. Landis and F. Weinhold, *J. Comput. Chem.*, 2013, **34**, 1429-1437.
